# Supplementary material for: An N-heterocyclic carbene-based pincer system of palladium and its versatile reactivity under oxidizing conditions
Source: Royal Society of Chemistry journal article supplement (doi:10.1039/d4dt00980k), 2024-01-01
Supplement: d4dt00980k1.pdf [file d4dt00980k1.pdf]

## Table of Contents

### For Supporting Information:

|                                                                                                                    |    |
|--------------------------------------------------------------------------------------------------------------------|----|
| 1. NMR spectra of newly reported compounds .....                                                                   | 2  |
| 2. ESI-MS spectra of newly reported compounds .....                                                                | 15 |
| 3. Cyclic voltammograms .....                                                                                      | 25 |
| 4. XPS spectrum of <b>5<sup>F</sup></b> .....                                                                      | 26 |
| 5. <sup>1</sup> H NMR spectra for the reaction of <b>2<sup>Br</sup></b> with benzyl chloride and iodomethane. .... | 27 |

# 1. NMR spectra of newly reported compounds

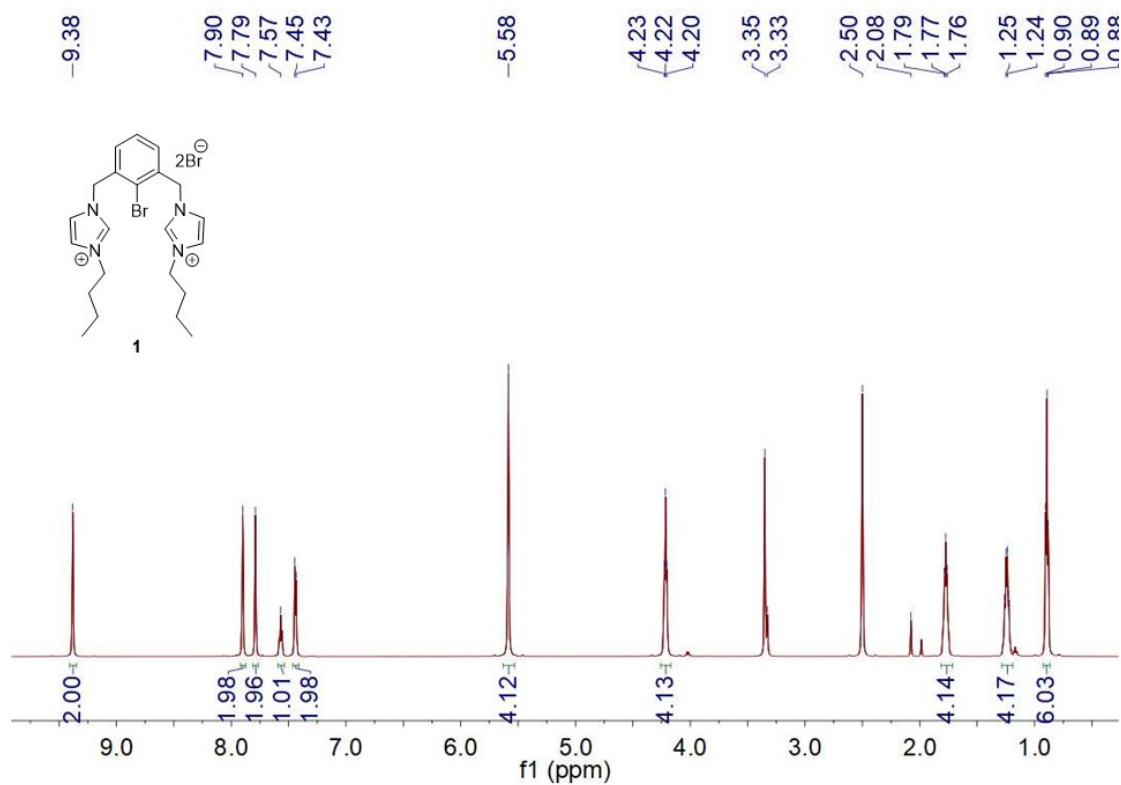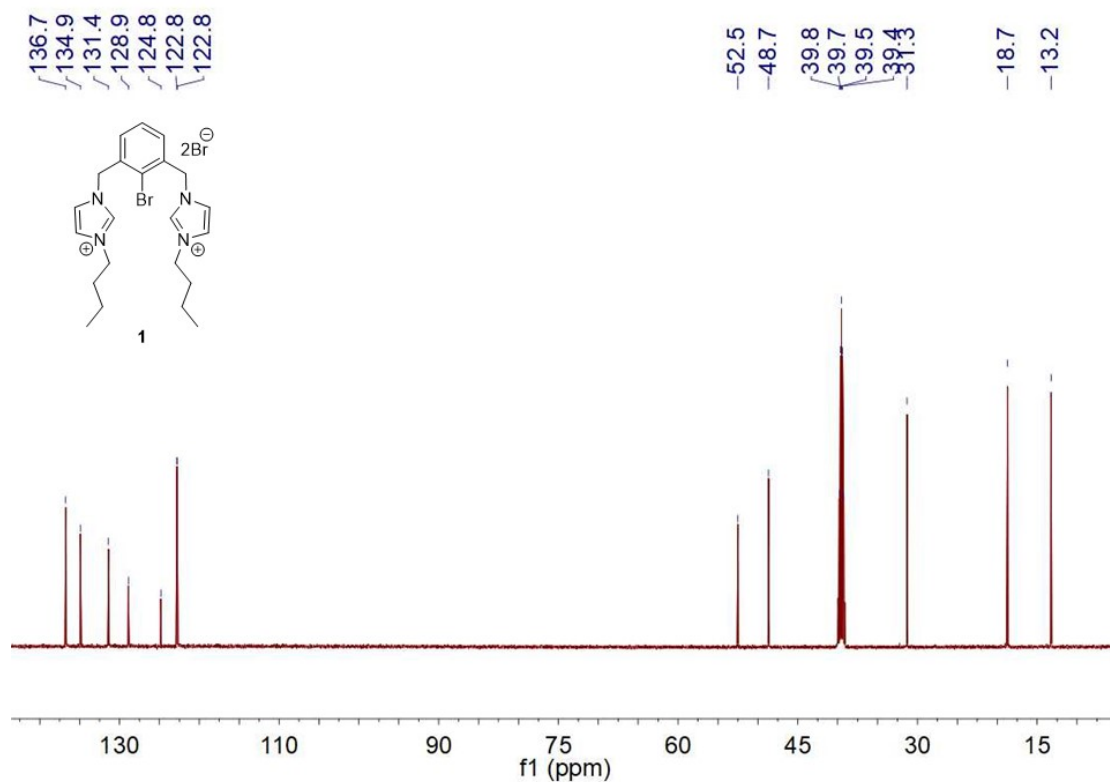

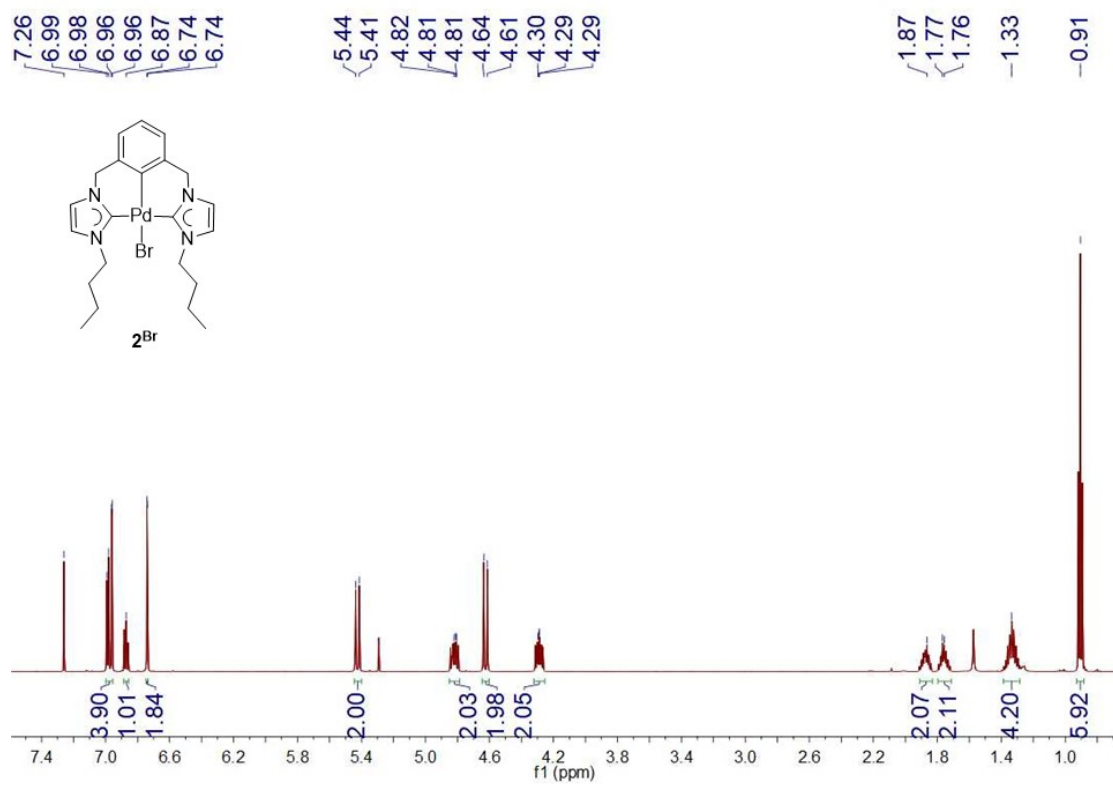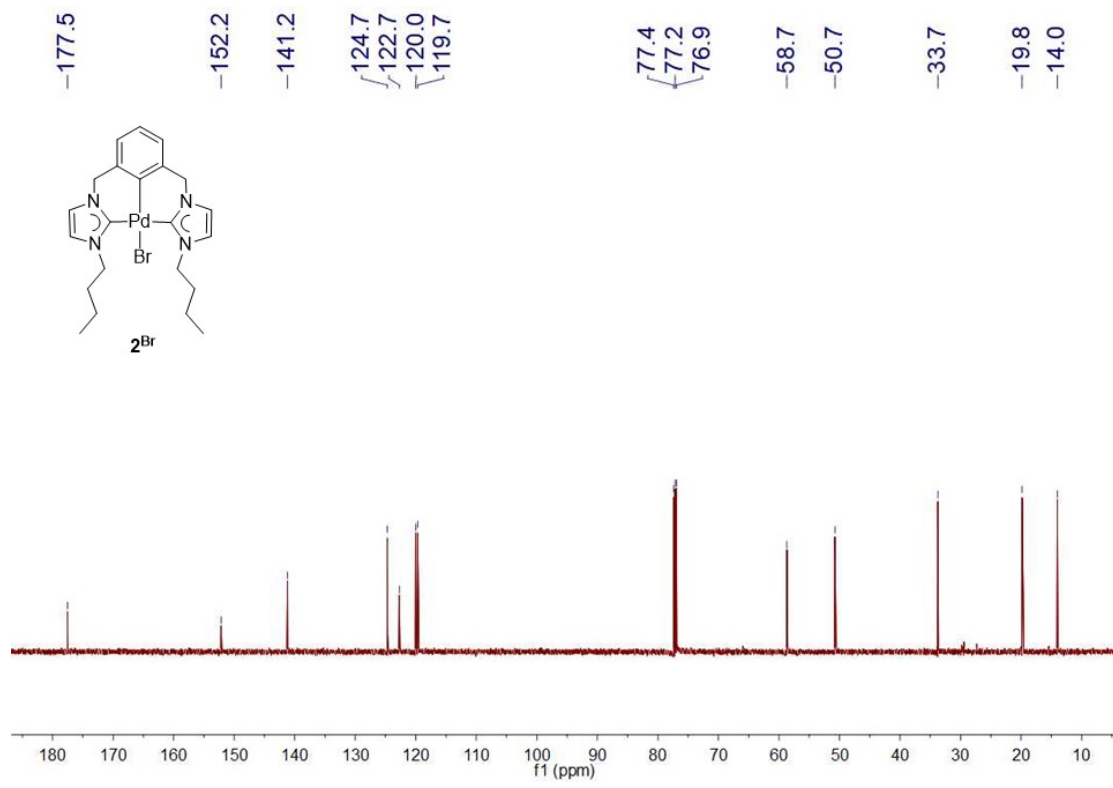

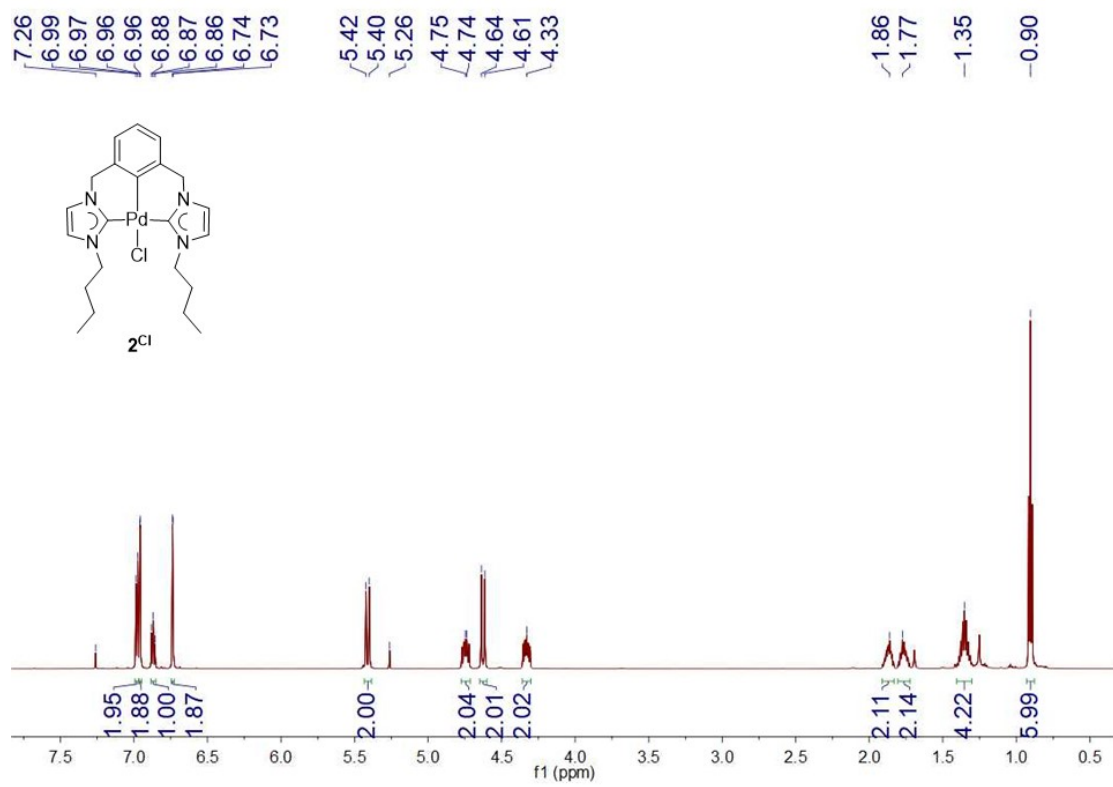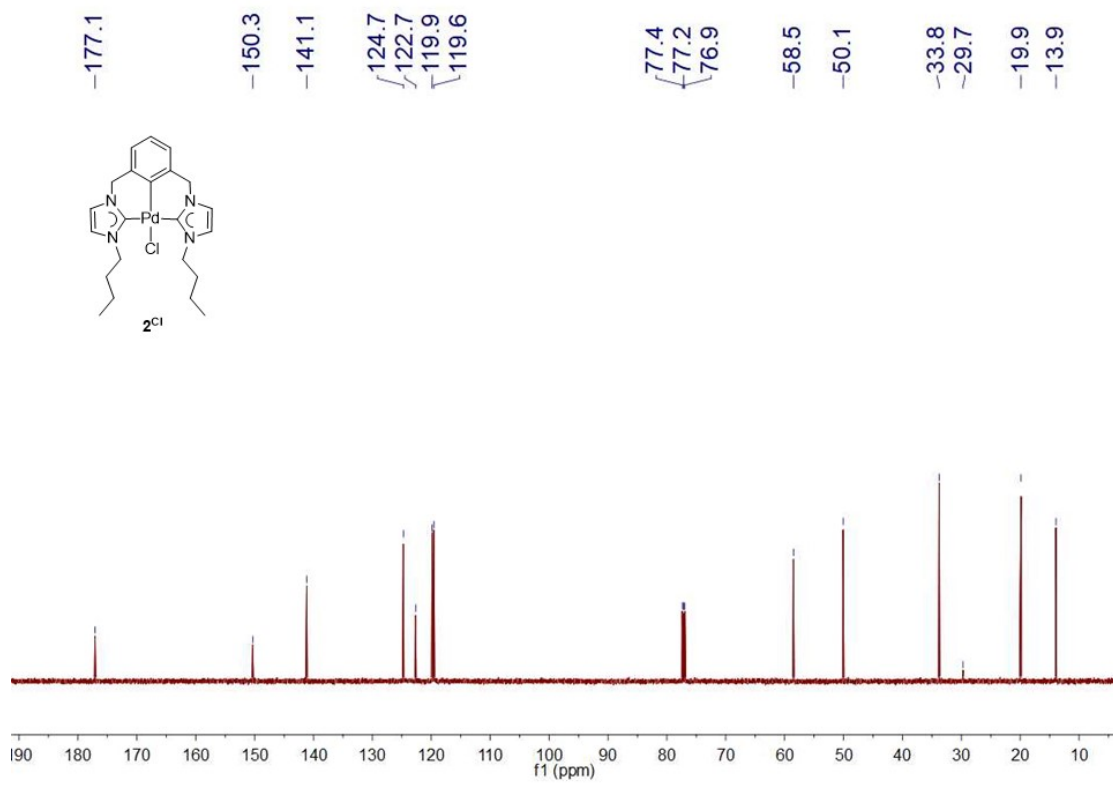

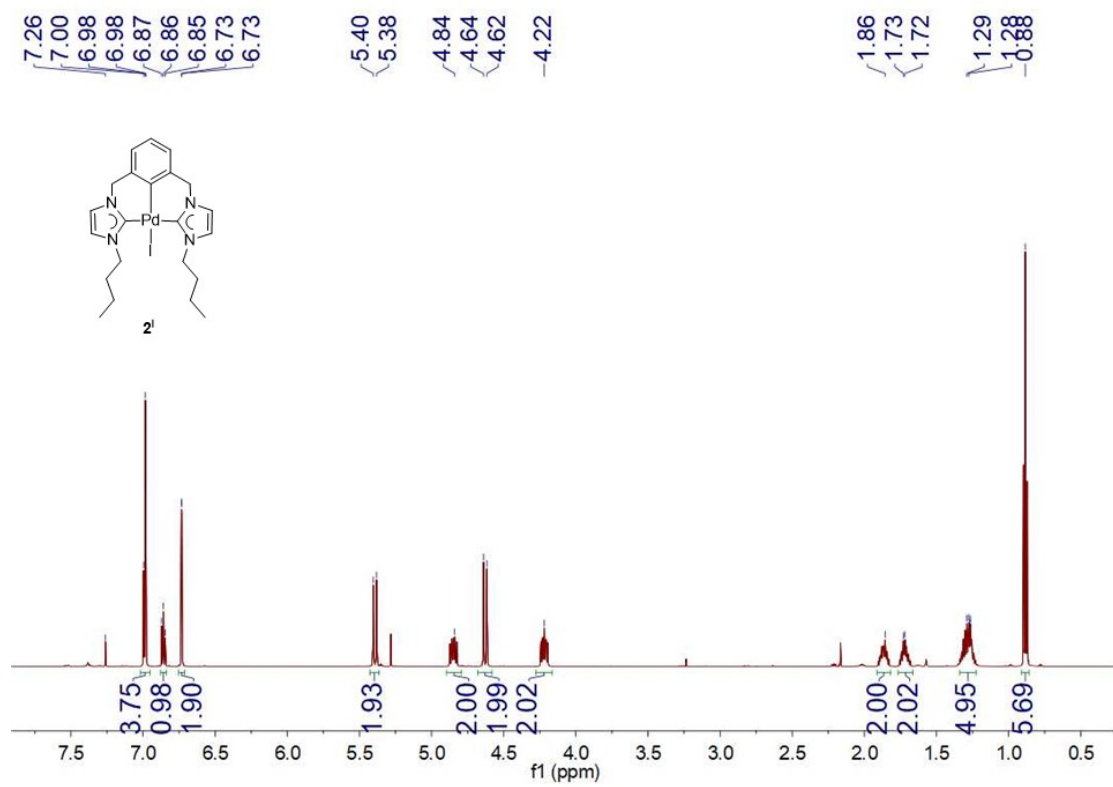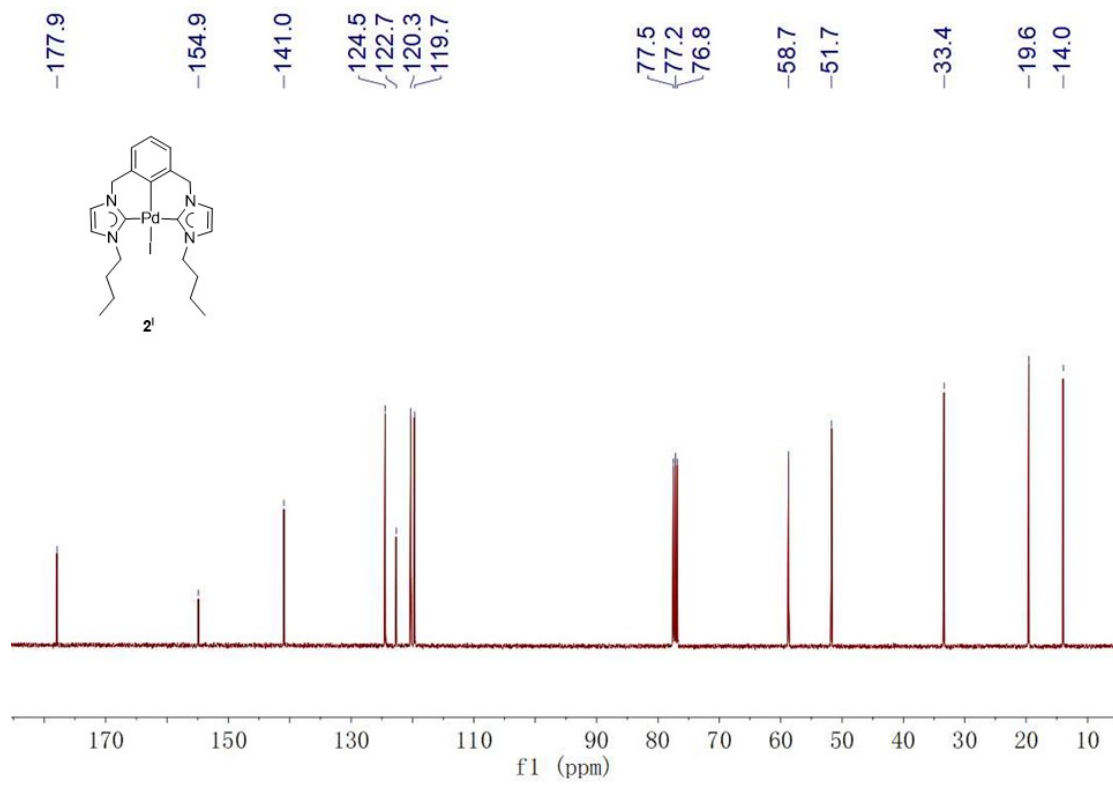

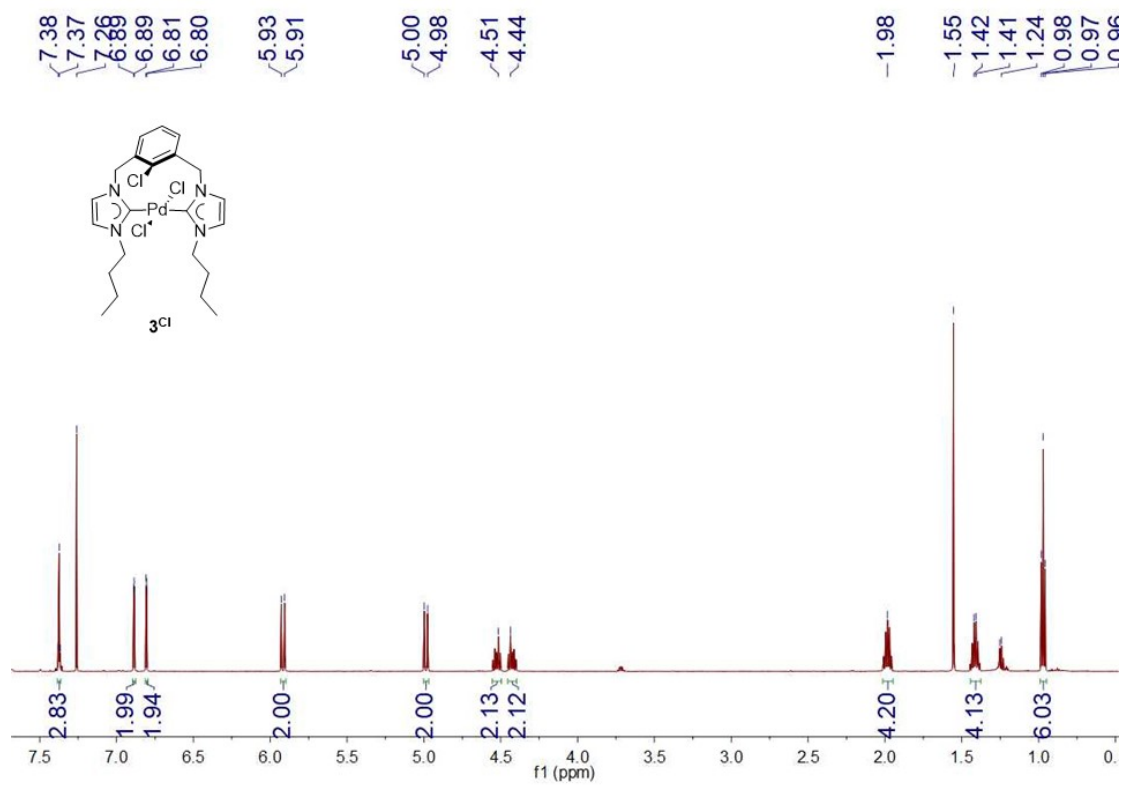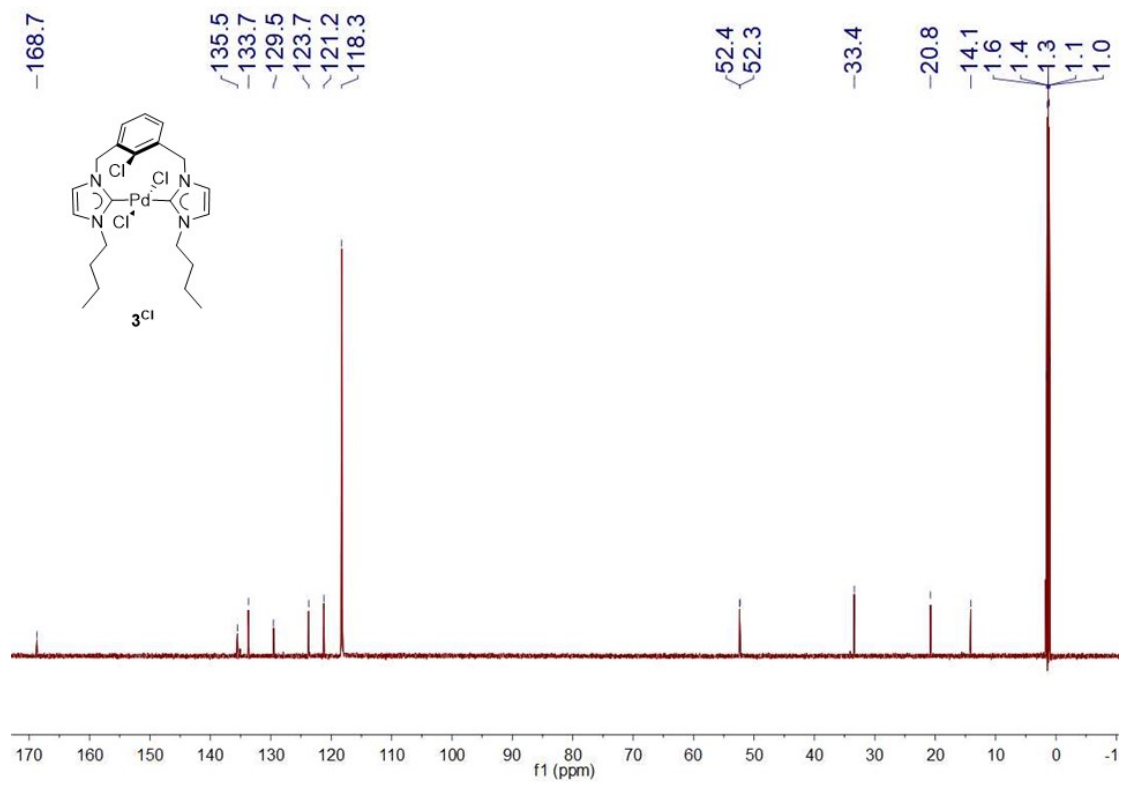

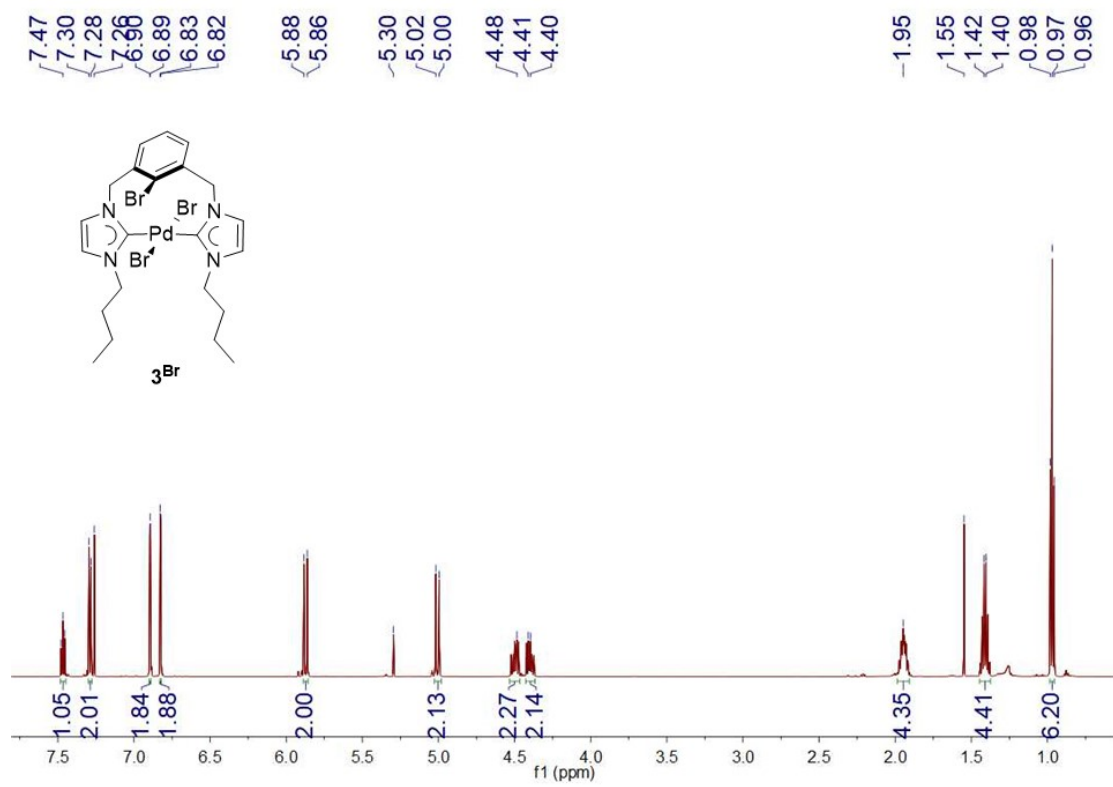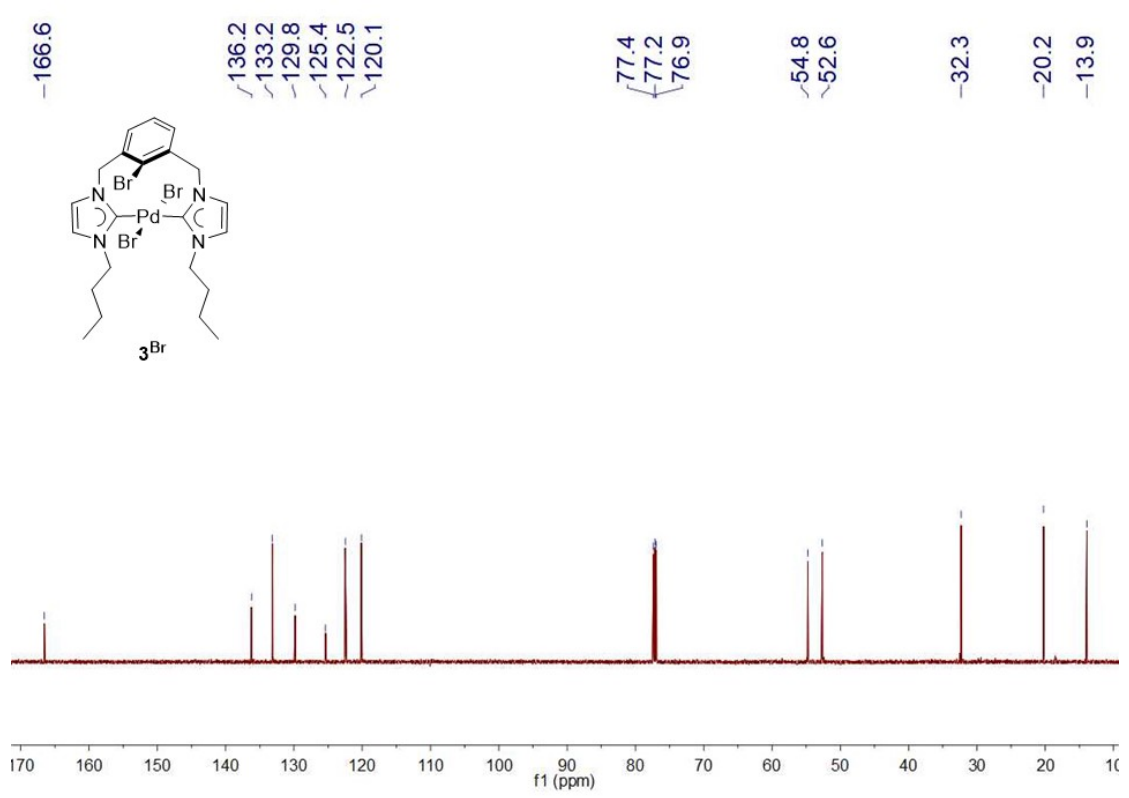





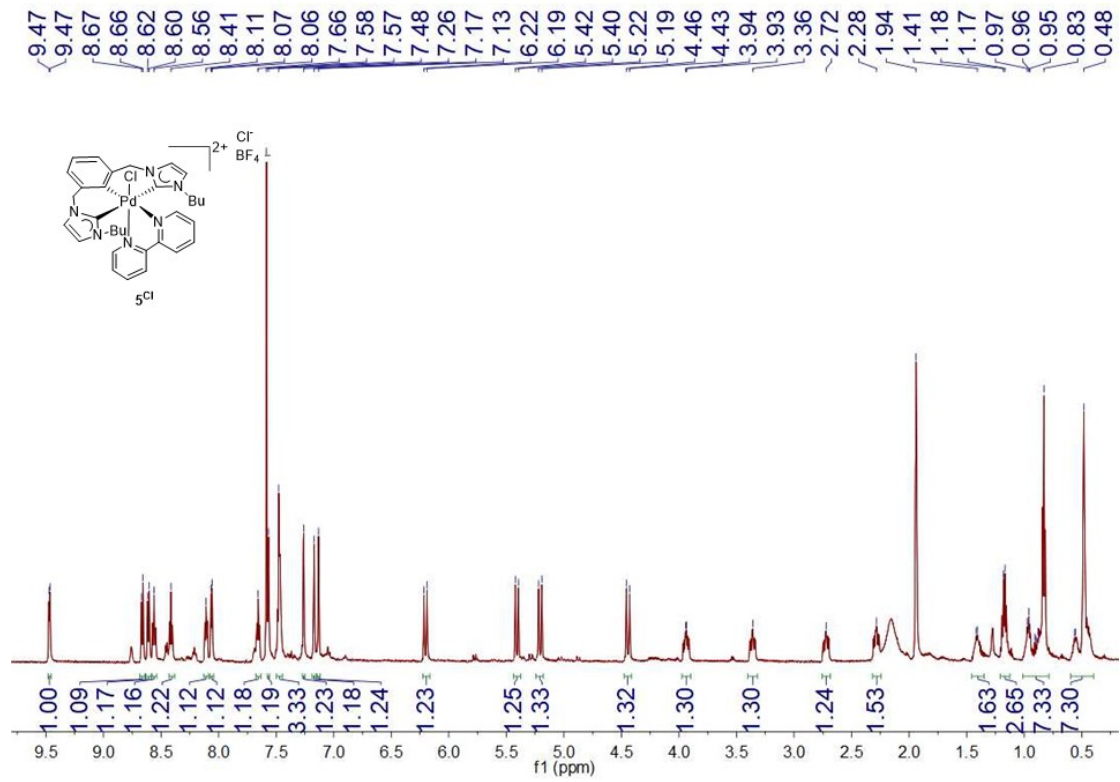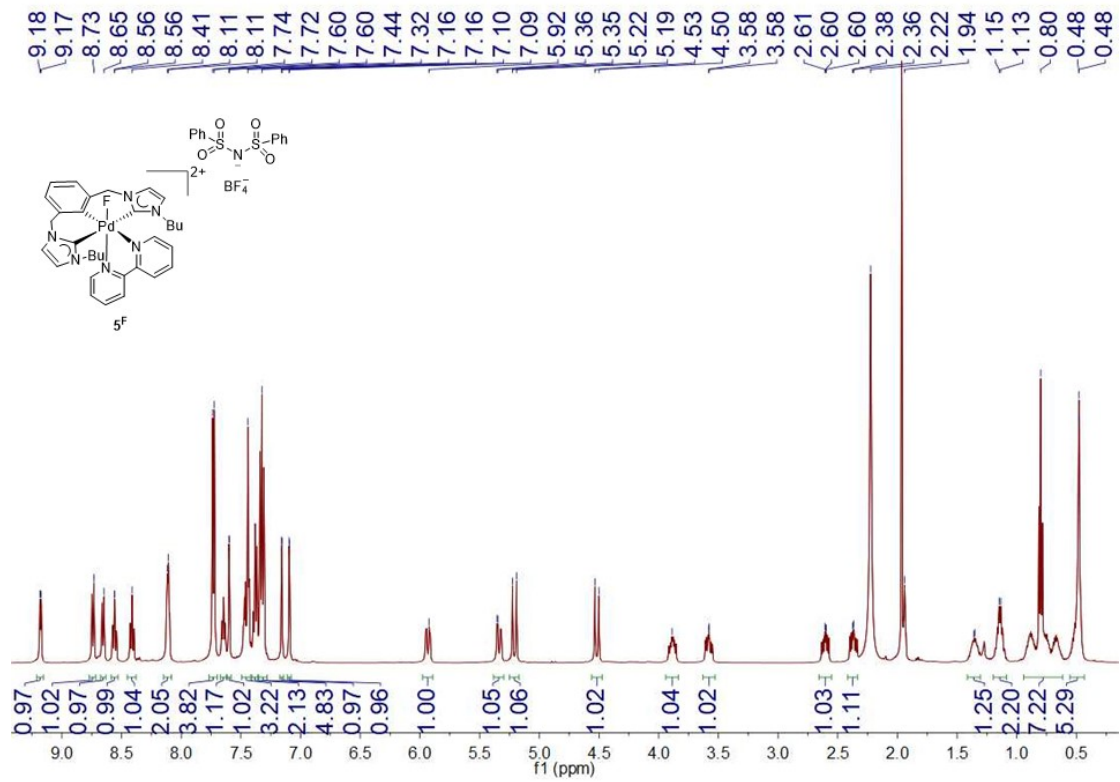

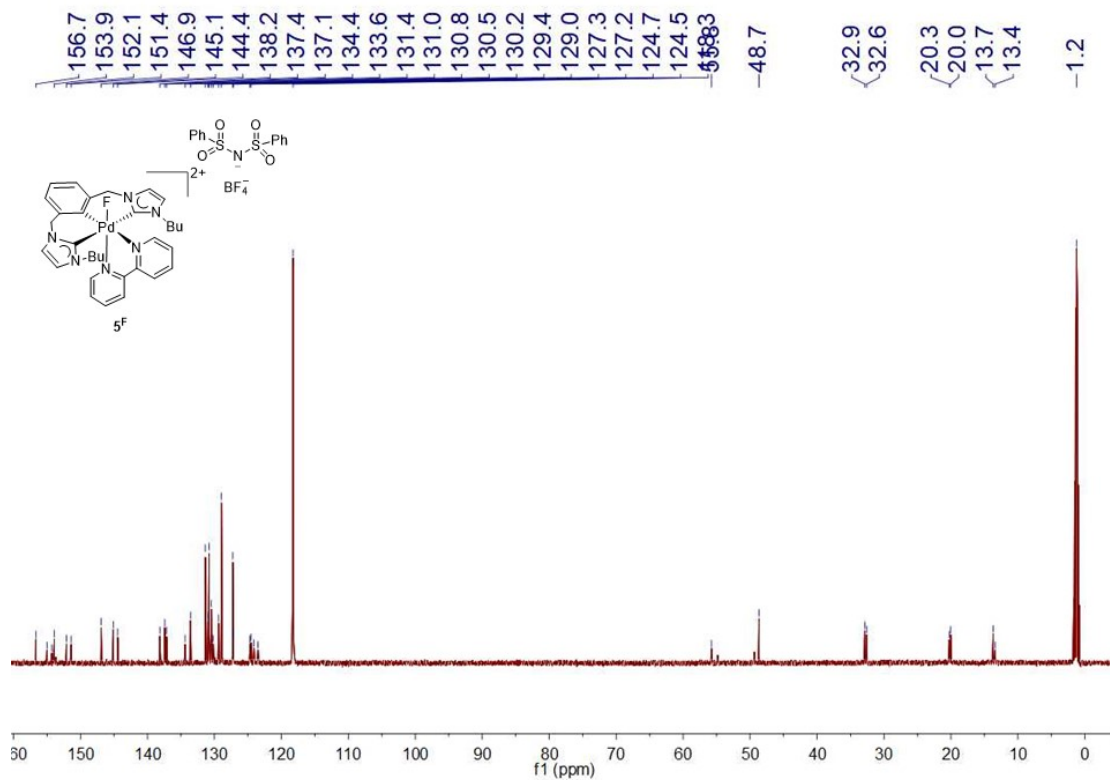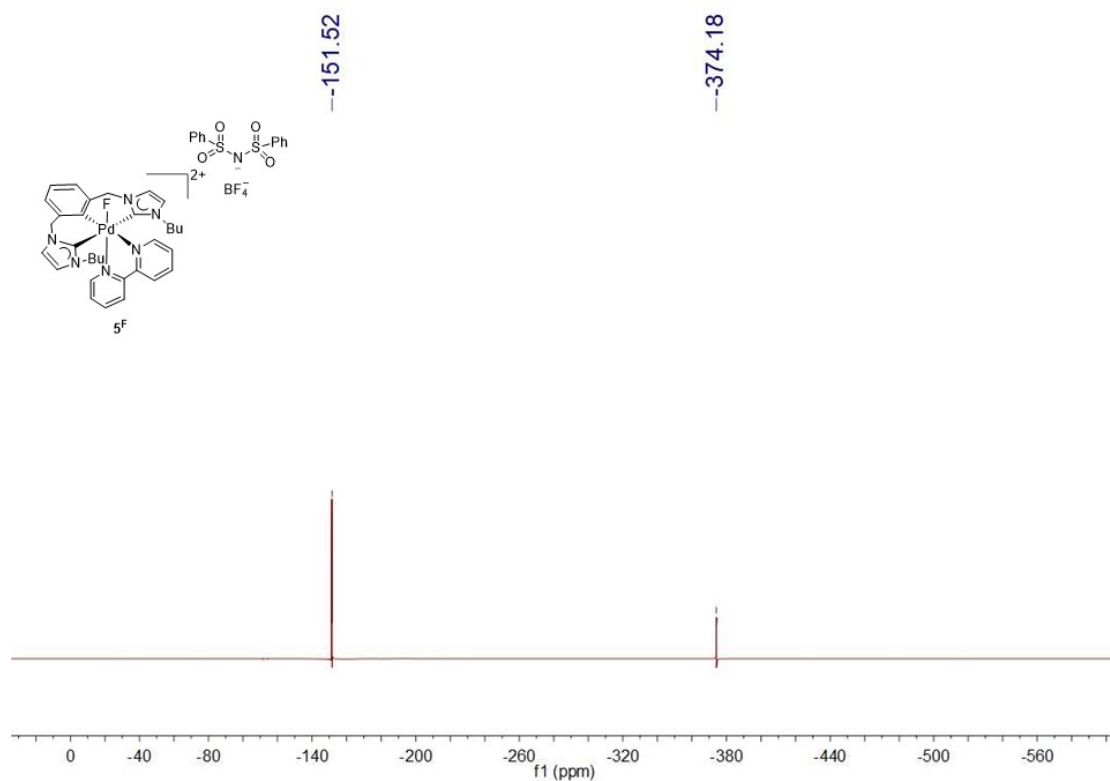

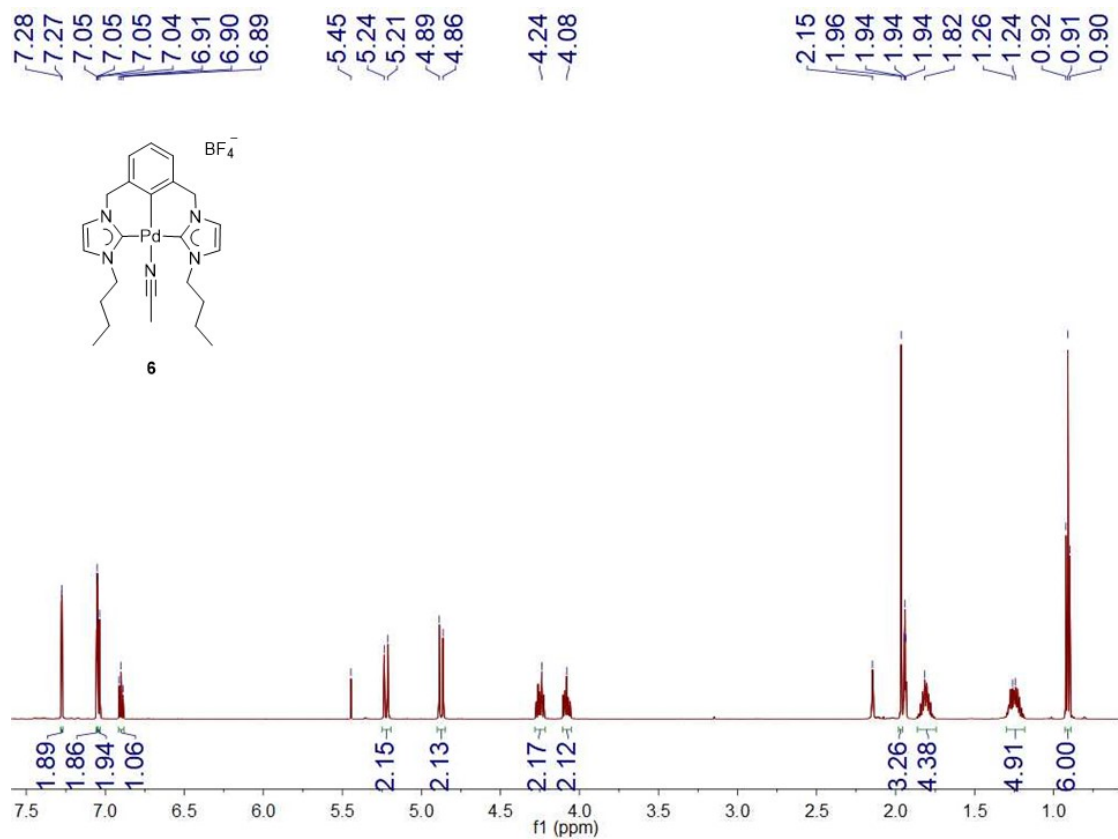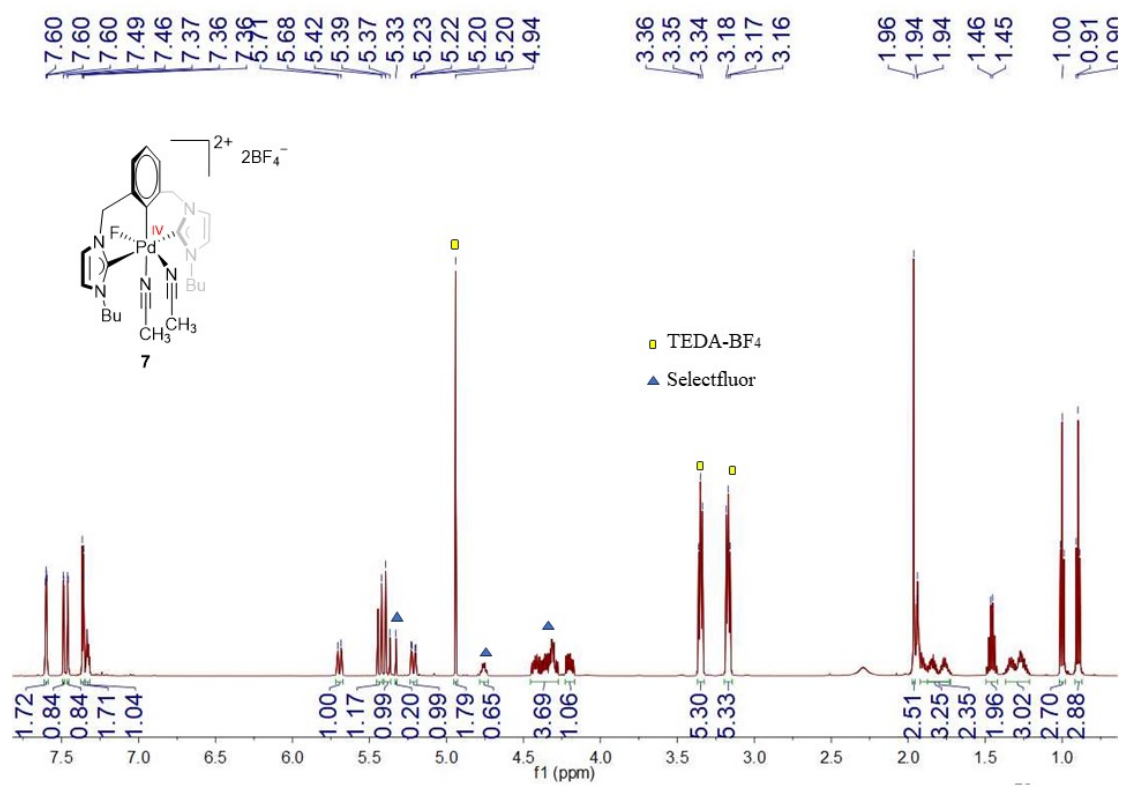

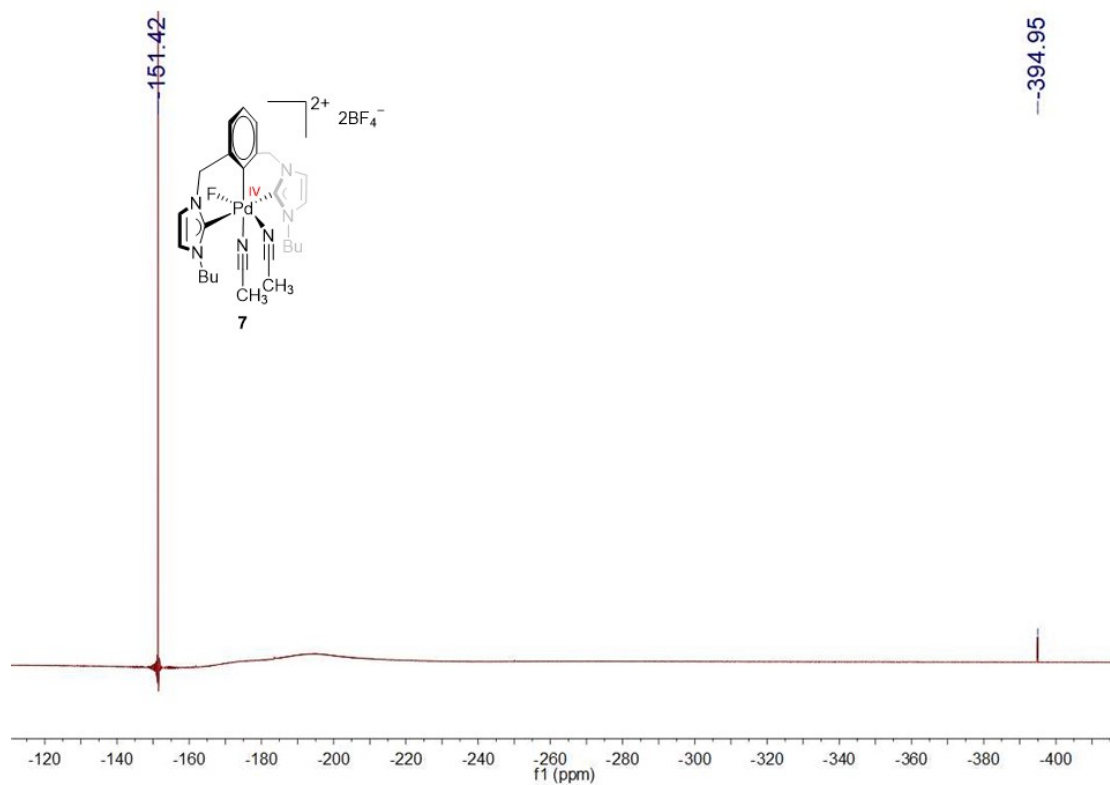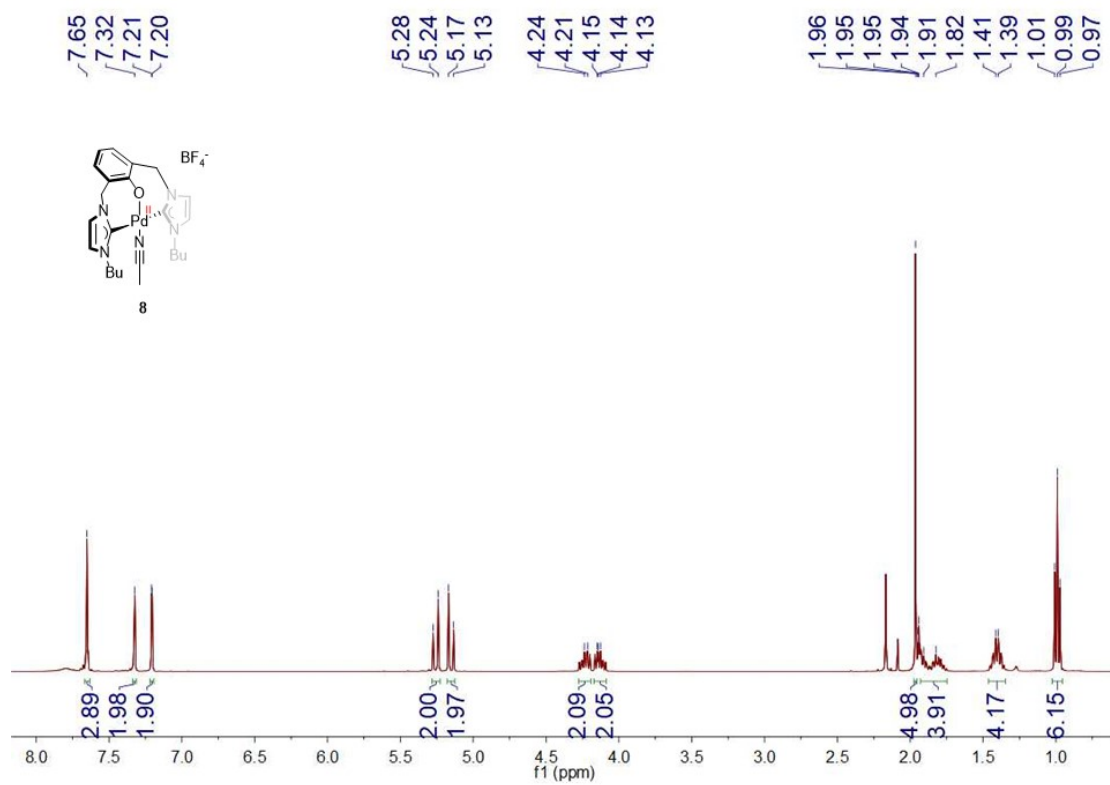

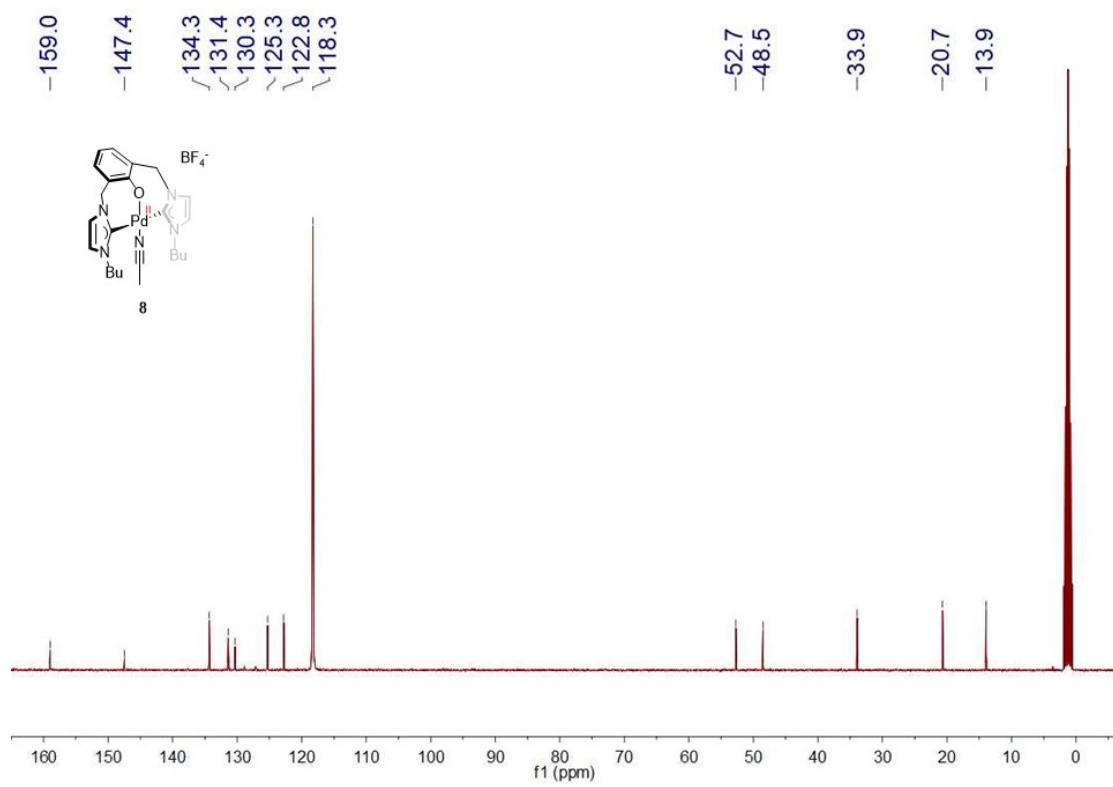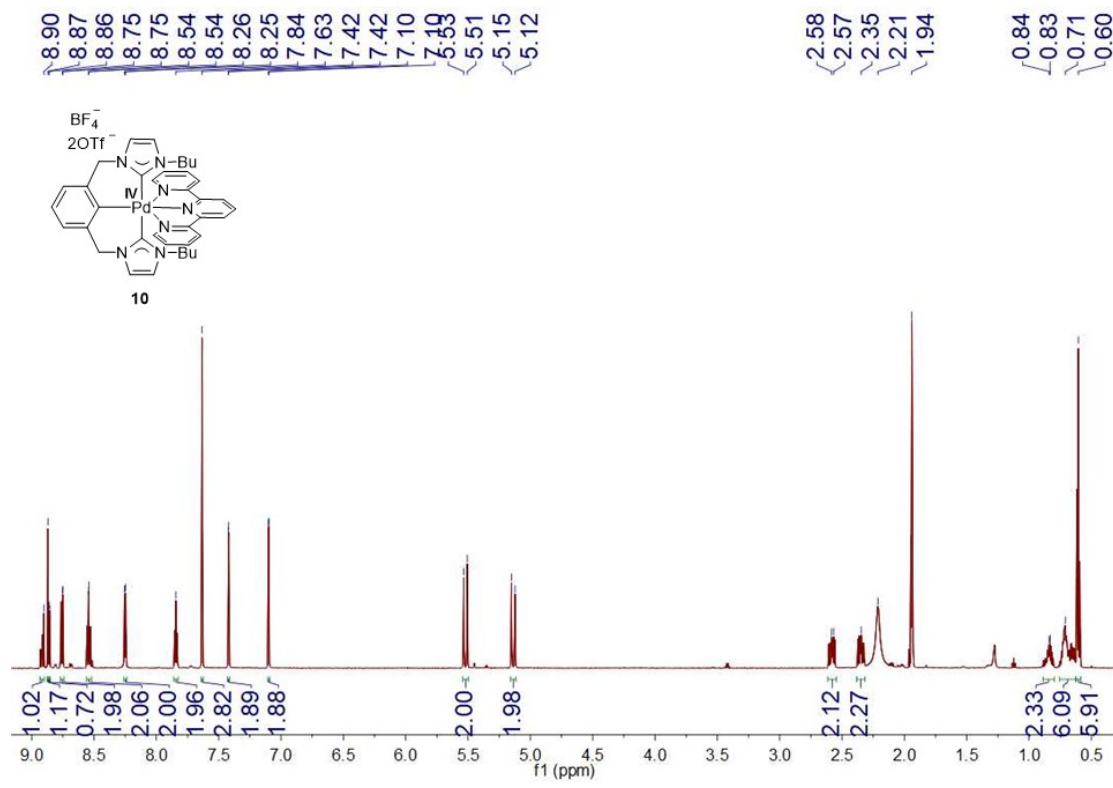

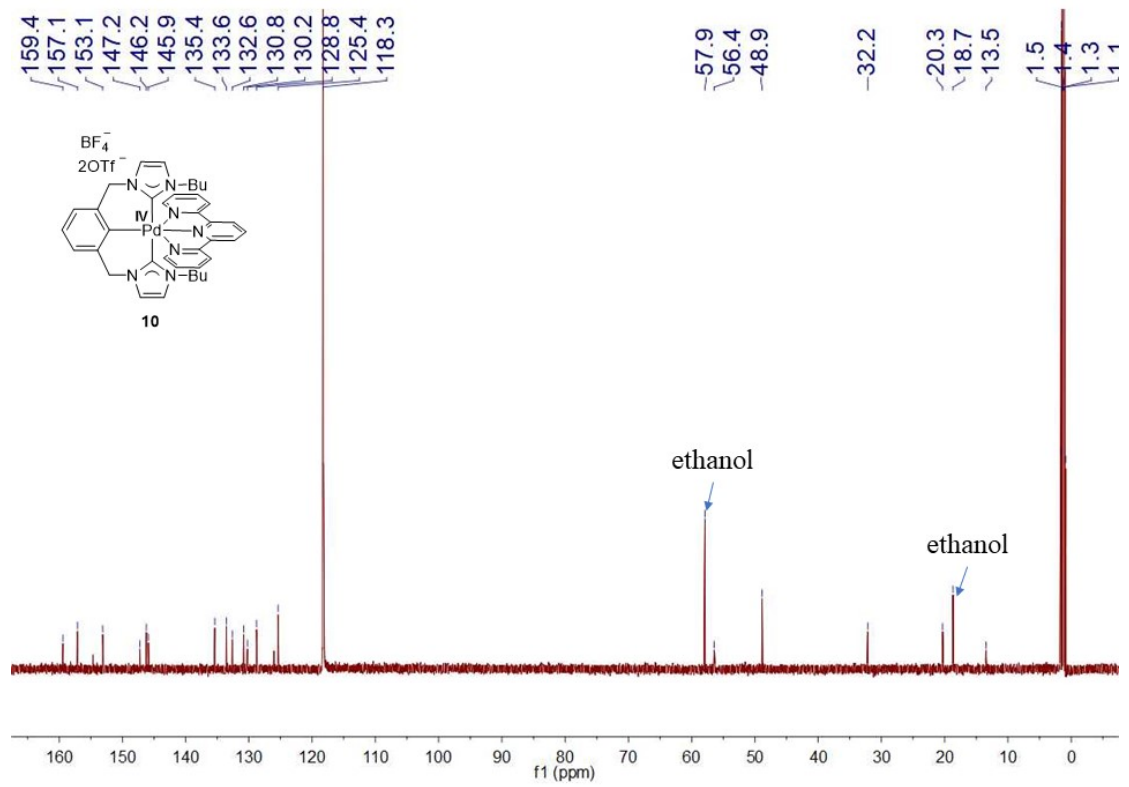

## 2. ESI-MS spectra of newly reported compounds

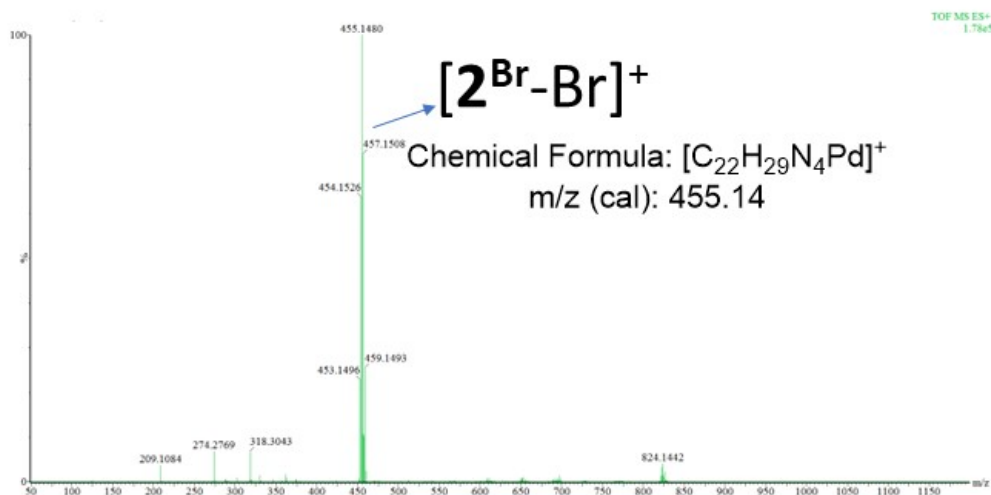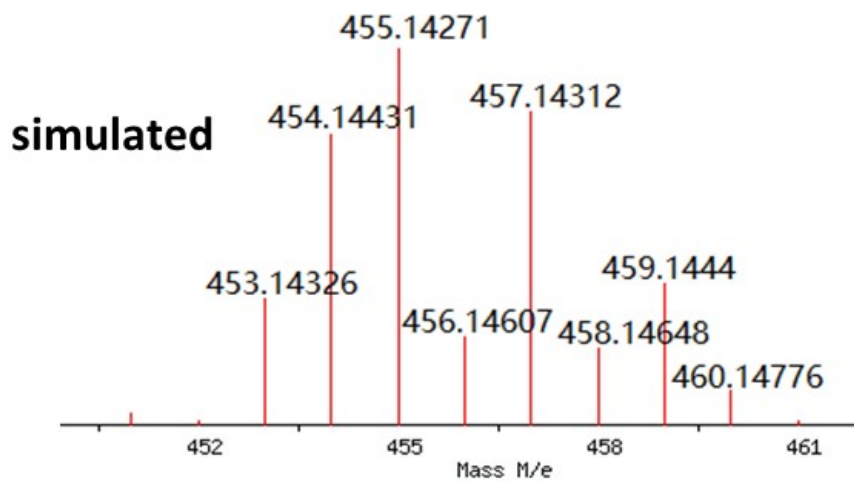

**experimental**

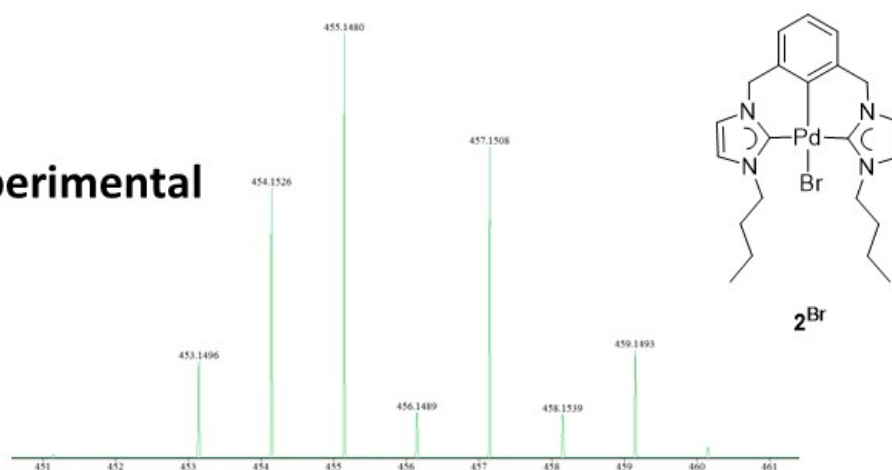

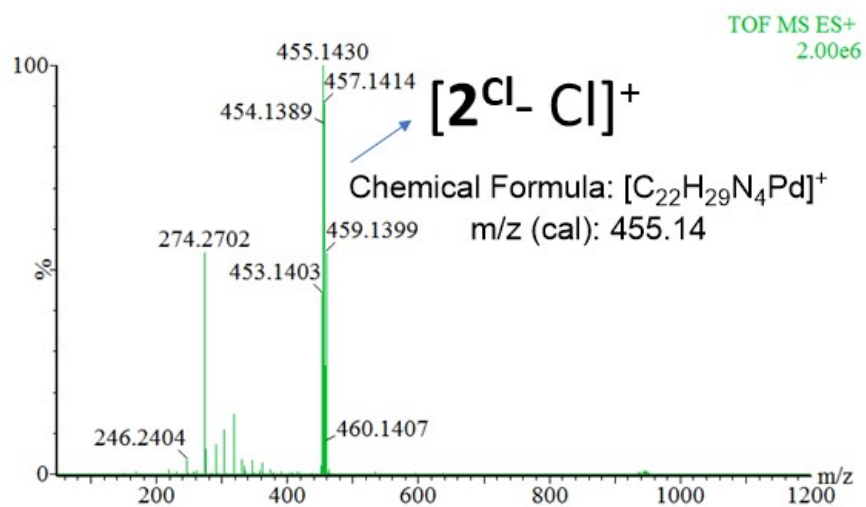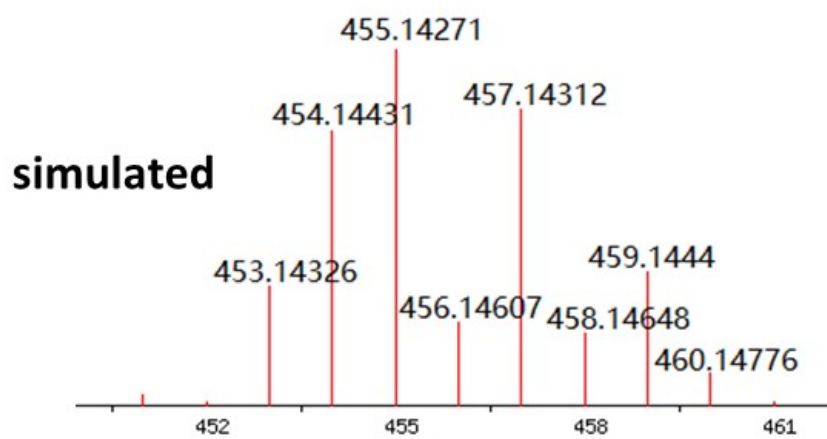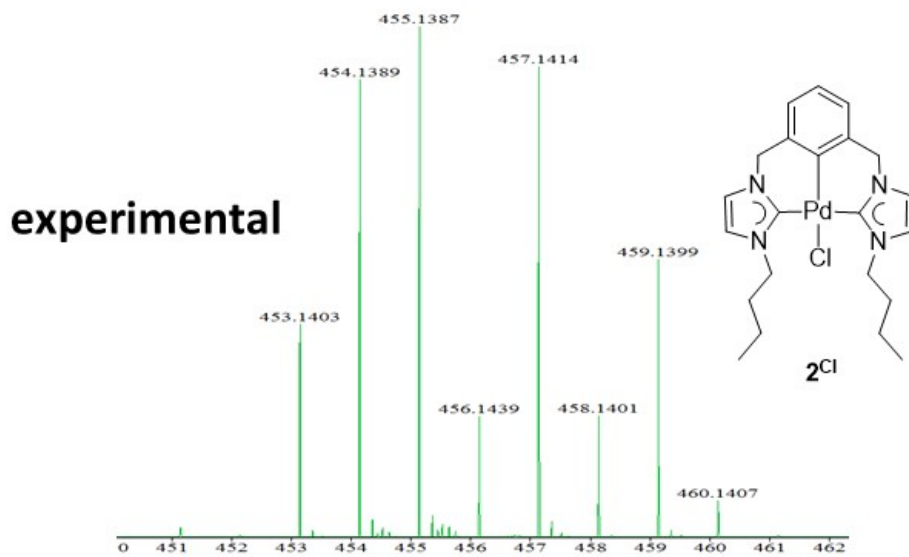



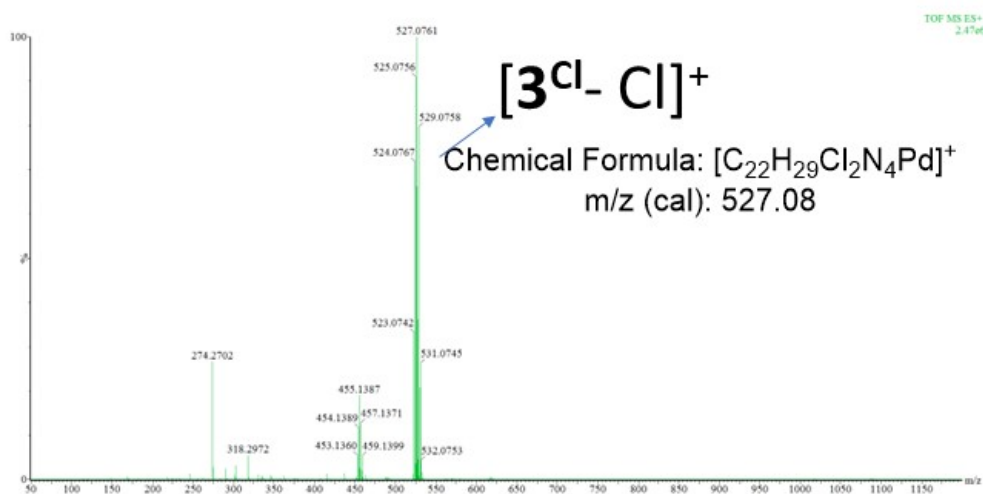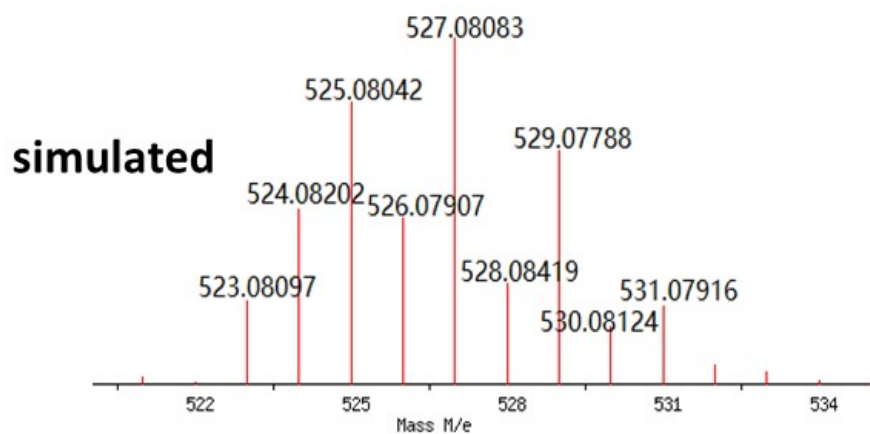

**experimental**

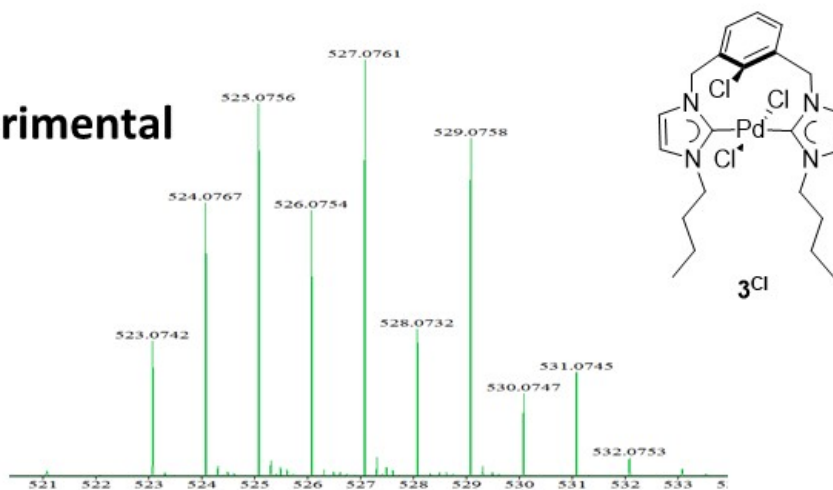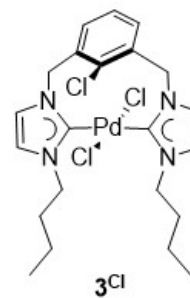

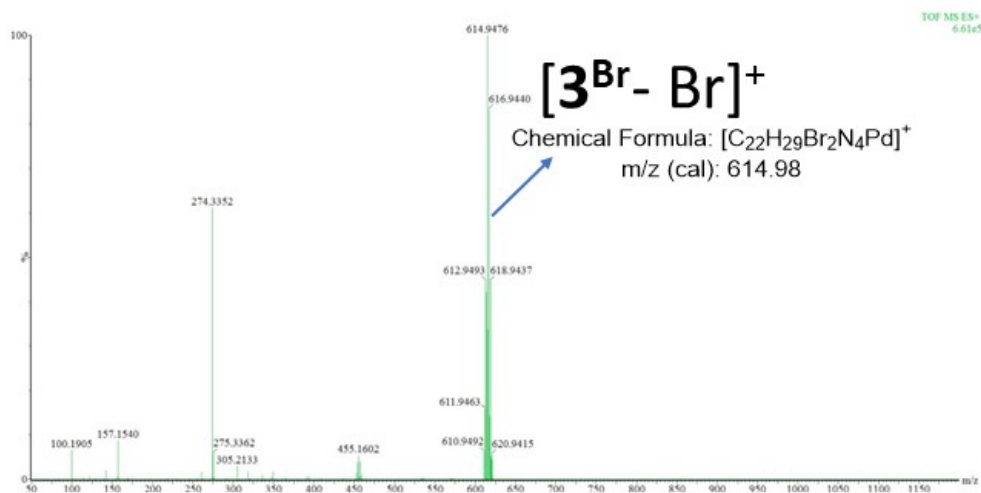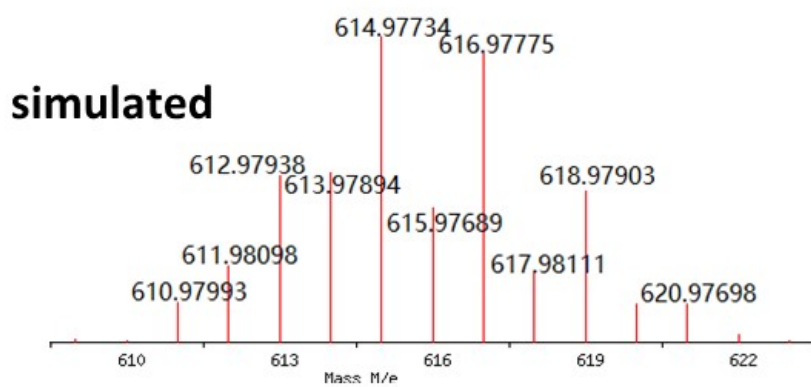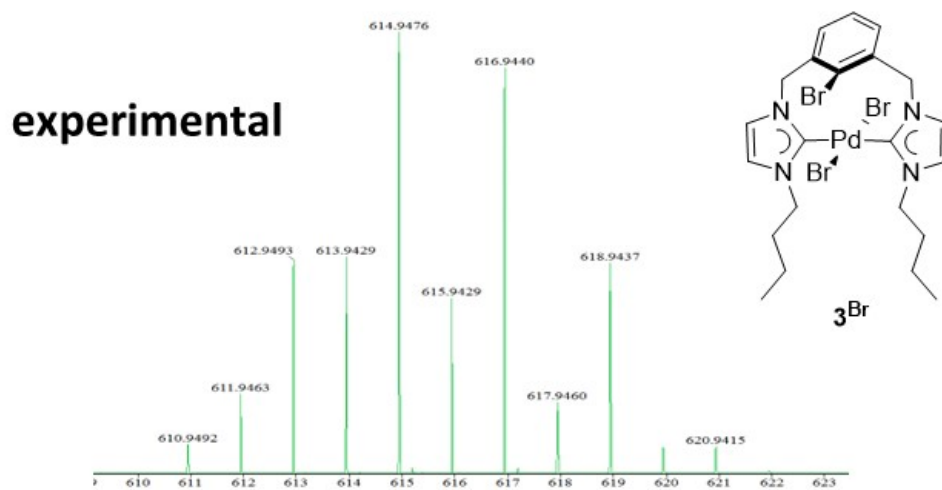

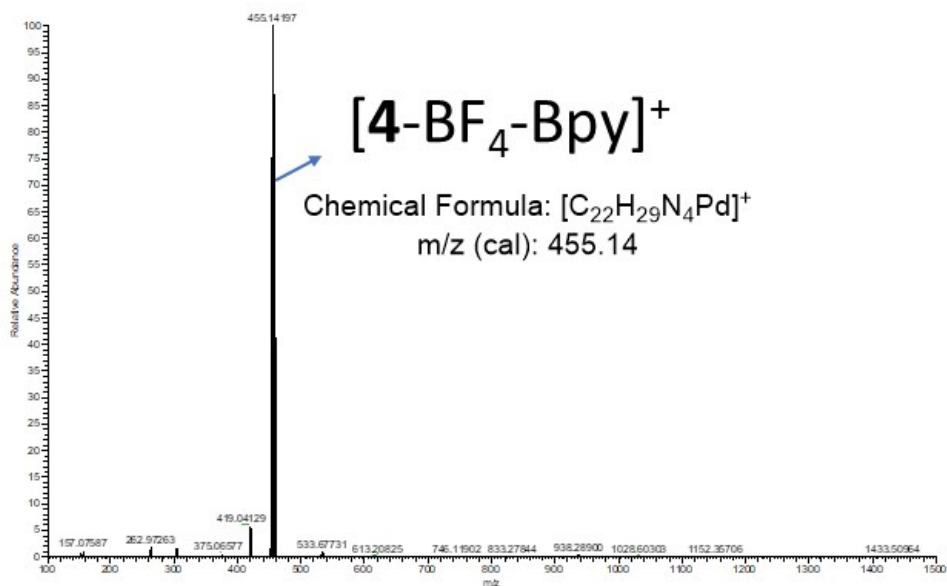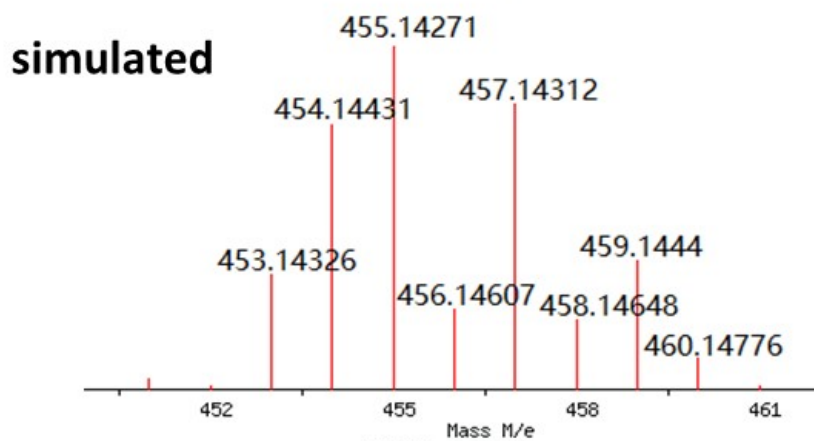

**experimental**

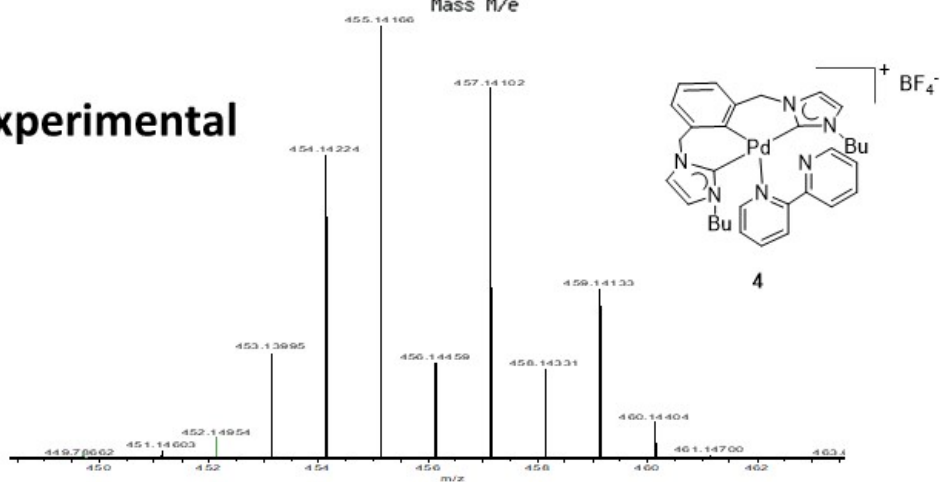

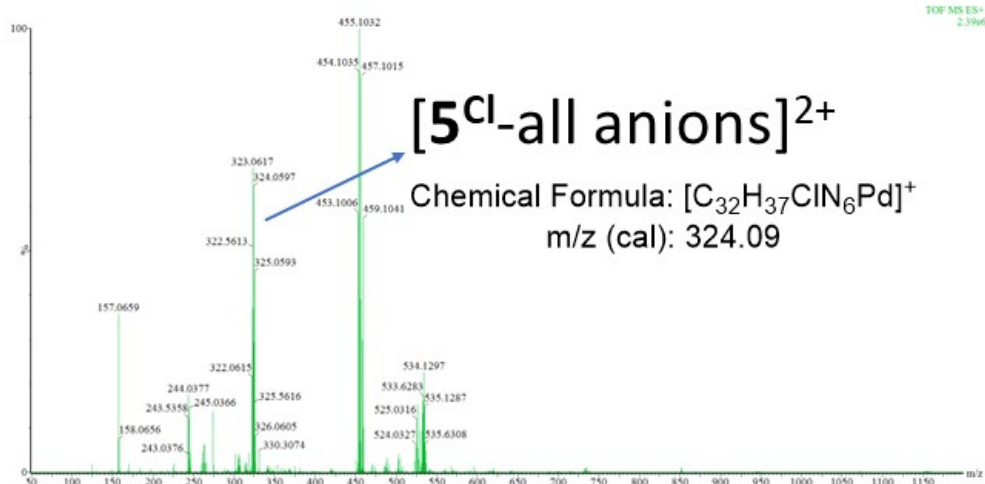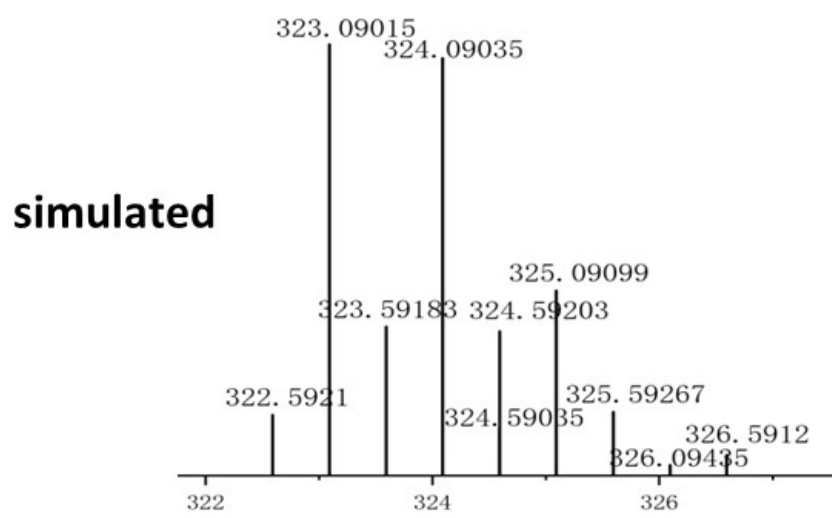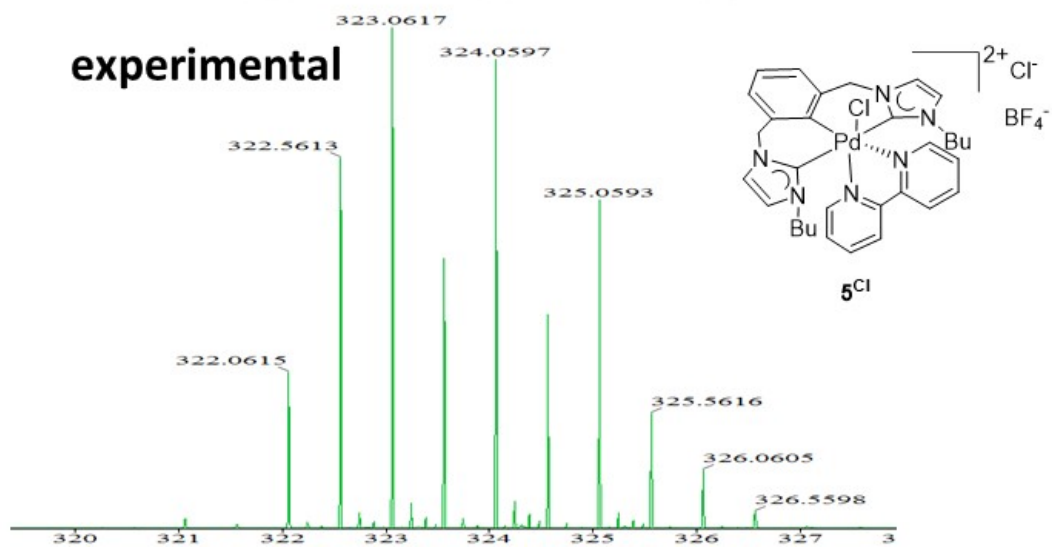

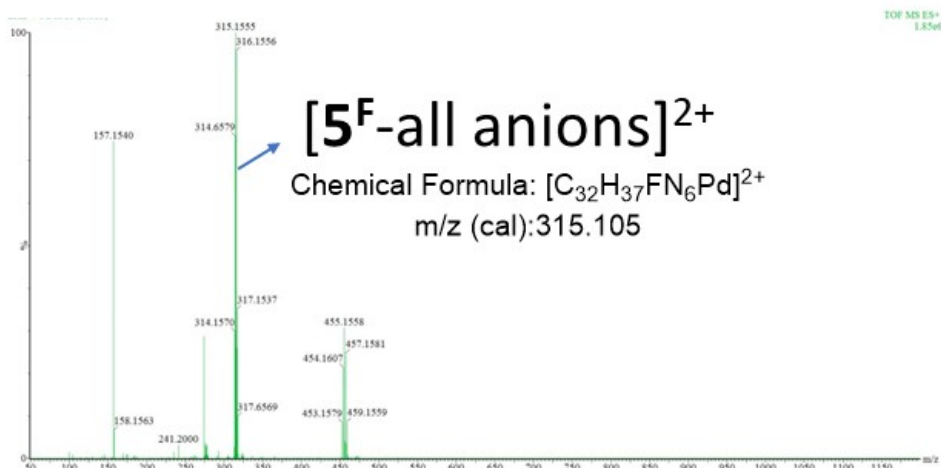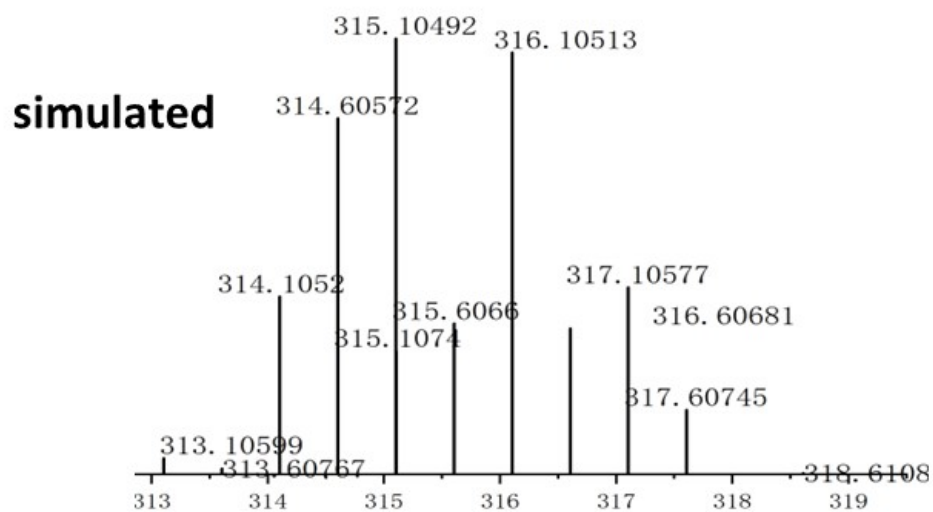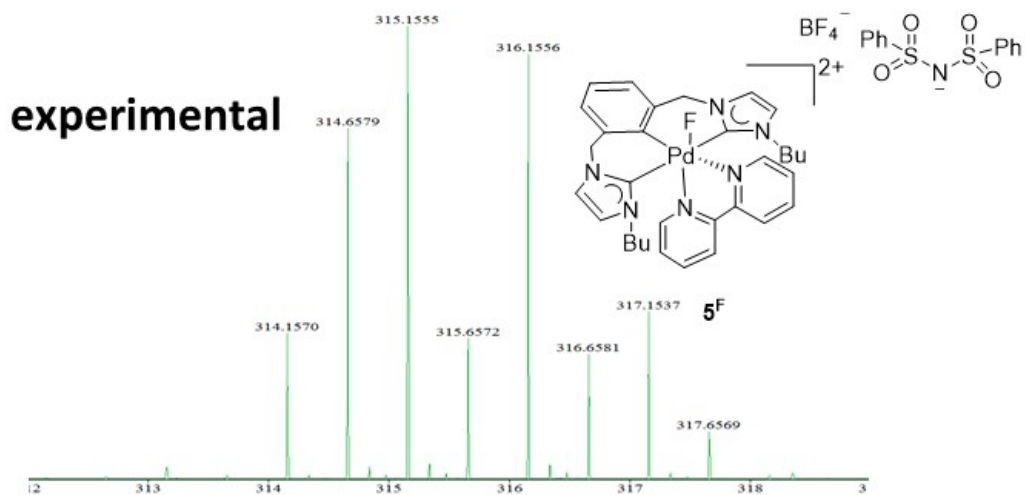

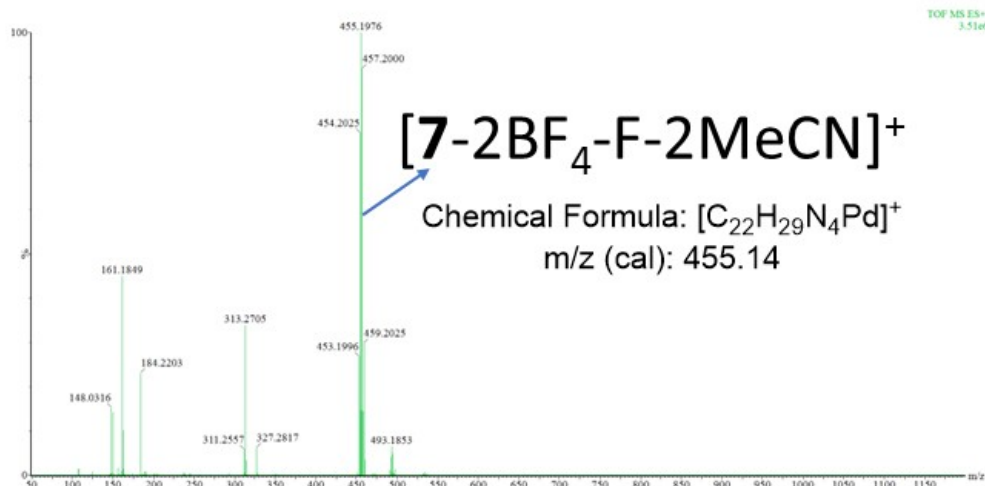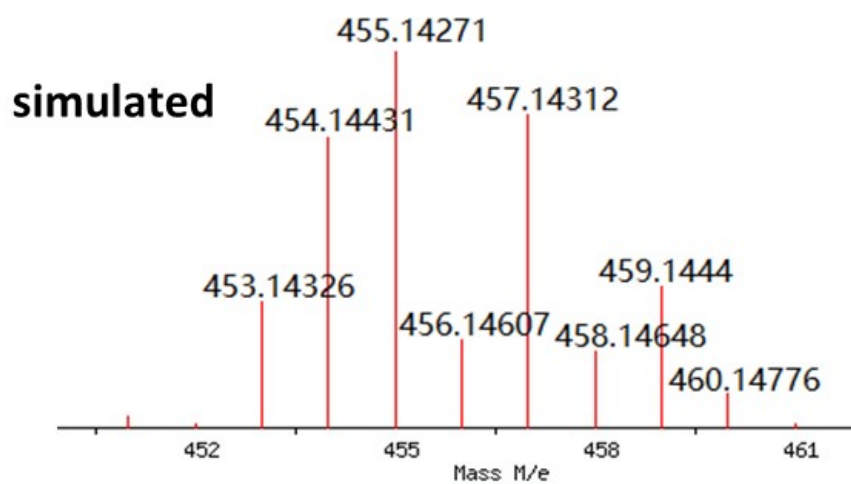

**experimental**

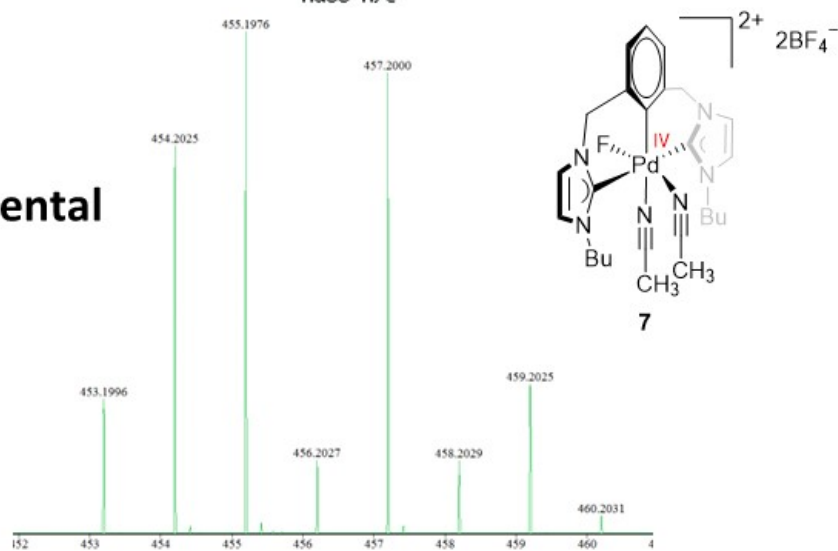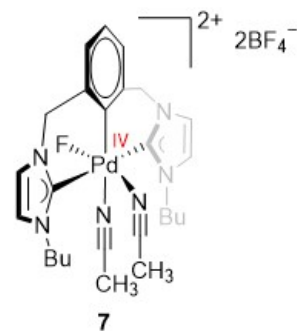

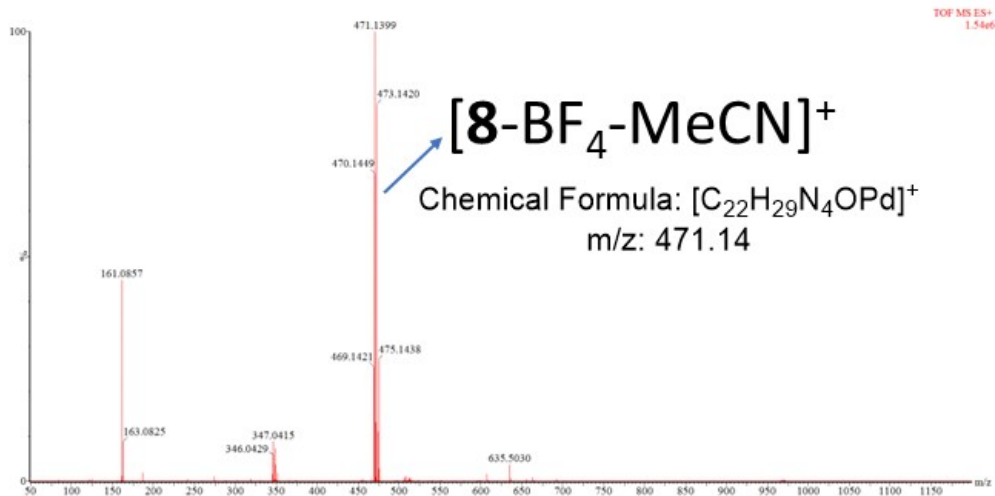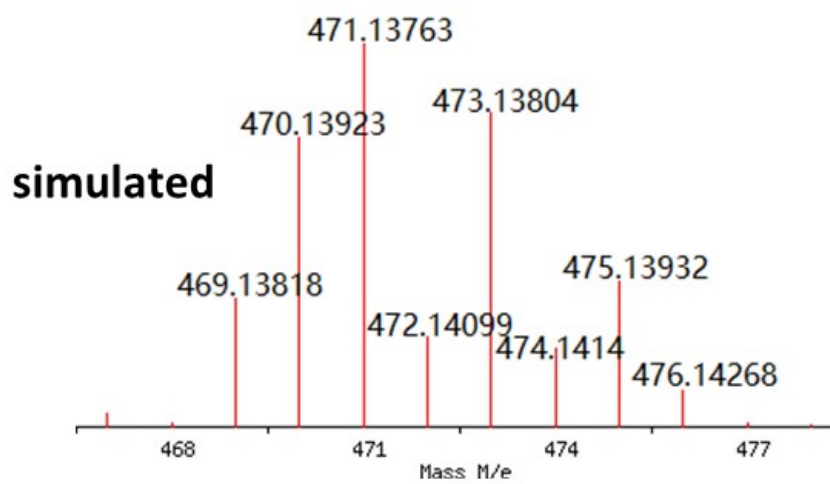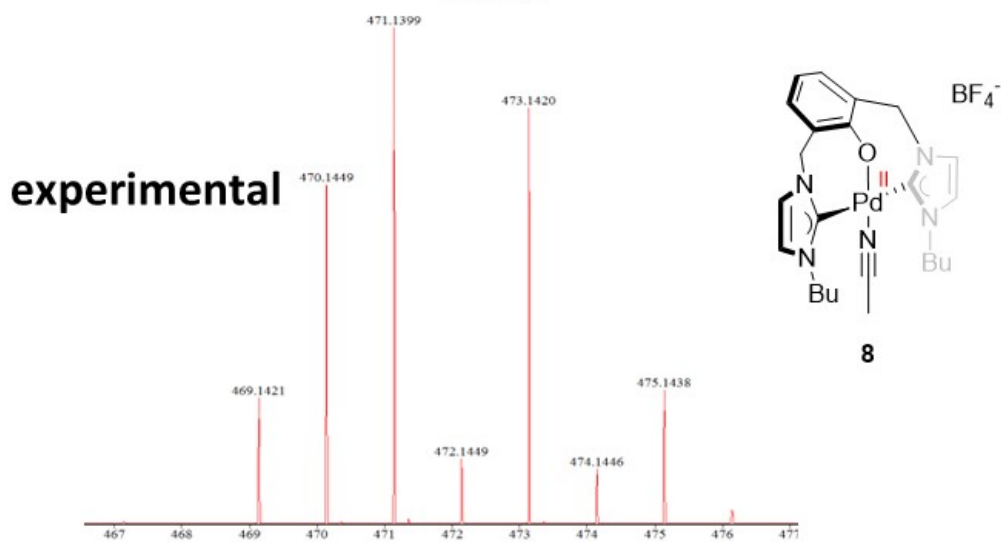

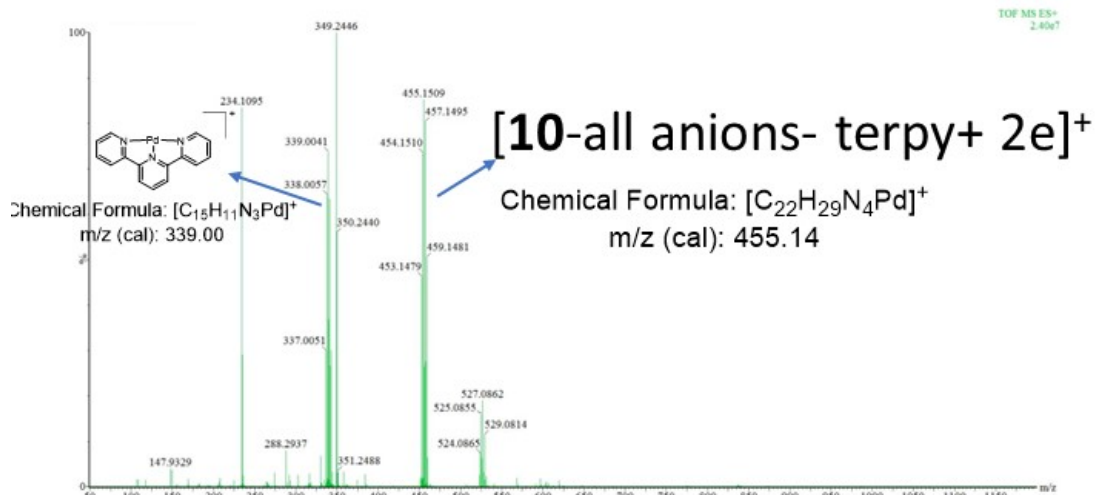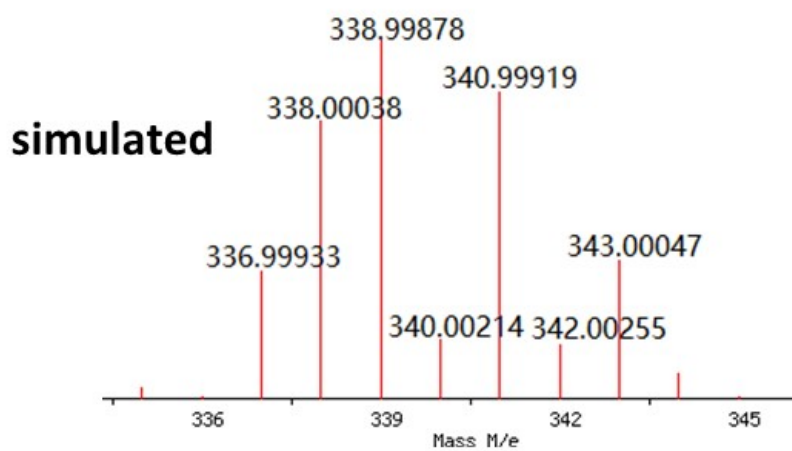

**experimental**

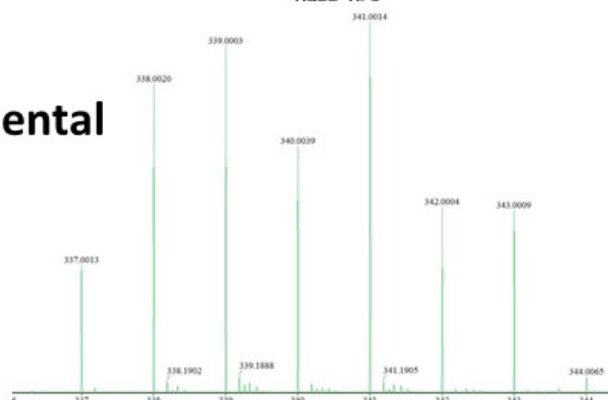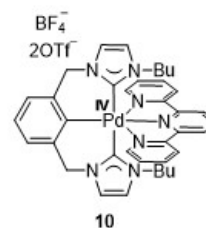

**Note:** Under the conditions of ESI mass spectrometry, **10** undergoes a collapse pathway and a redox event occurs. In its ESI-MS spectrum, tris(pyridine) and carbene-pincer supported Pd<sup>II</sup> species were observed. Similar degradations, although much less significant, were also observed in the cases of **5<sup>Cl</sup>** and **5<sup>F</sup>**.



### 3. Cyclic voltammograms

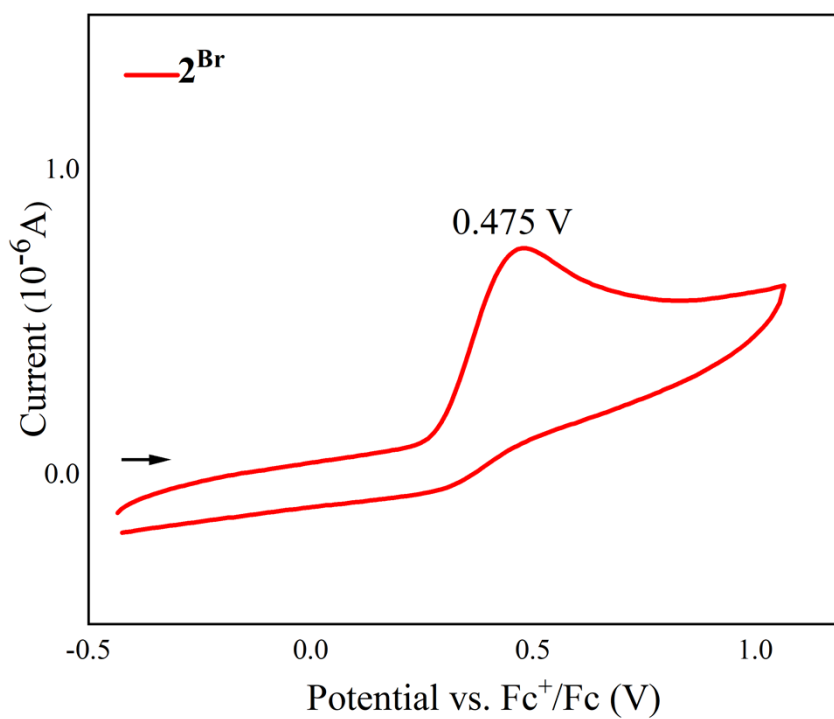

Figure S1. CV of  $2^{\text{Br}}$

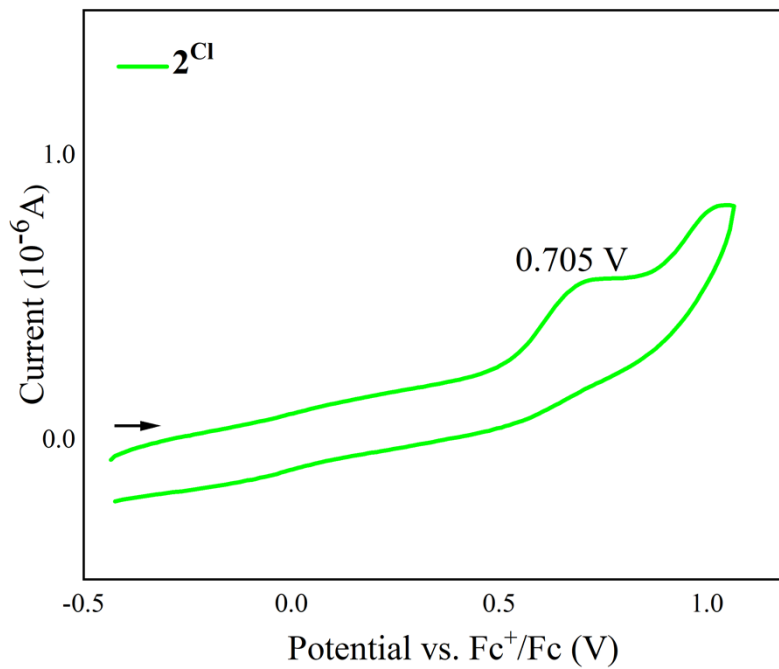

Figure S2. CV of  $2^{\text{Cl}}$

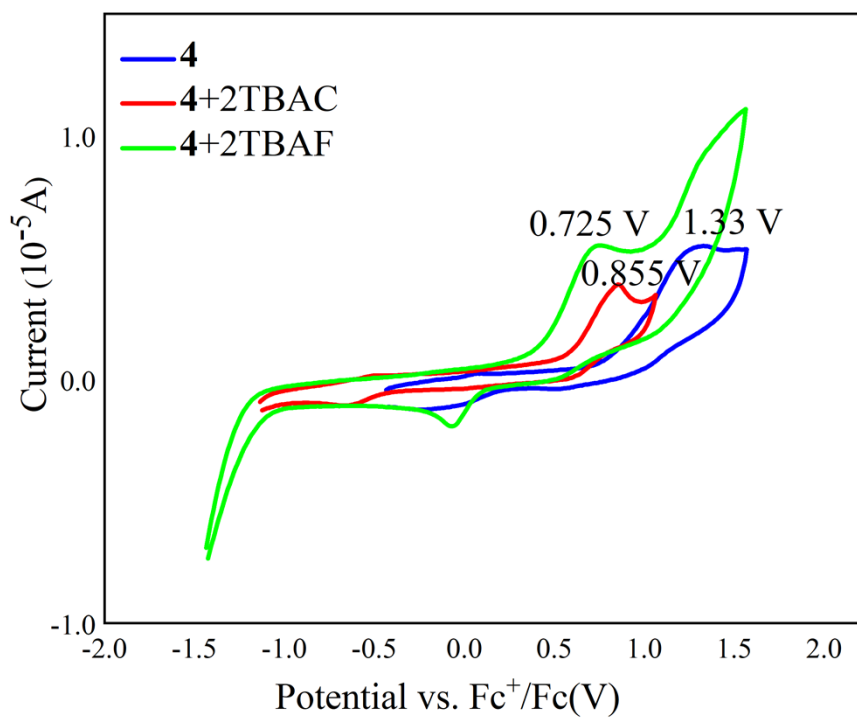

Figure S3. CV of **4** (blue), **4** with 2 equivalents of TBAC (red) and TBAF (green)

#### 4. XPS spectra of **5<sup>Cl</sup>** and **5<sup>F</sup>**

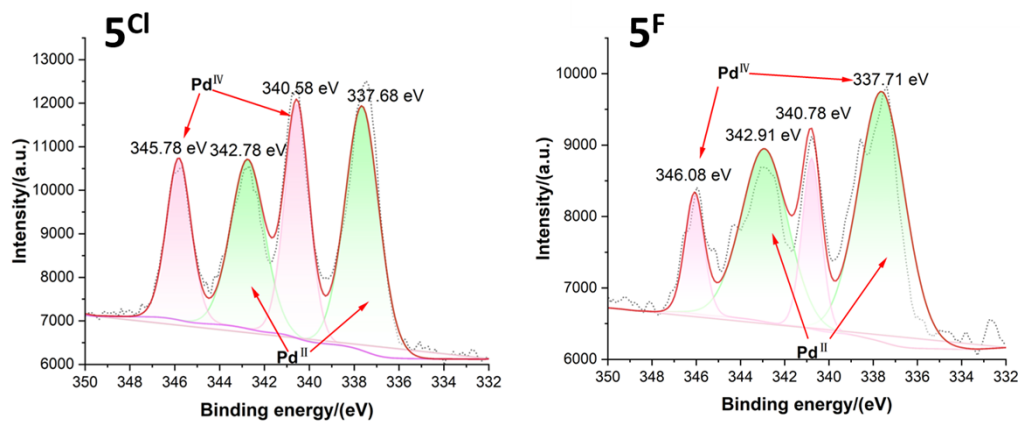

Figure S4. XPS spectra of **5<sup>Cl</sup>** and **5<sup>F</sup>**

5.  $^1\text{H}$  NMR spectra for the reaction of  $2^{\text{Br}}$  with iodomethane and benzyl chloride.

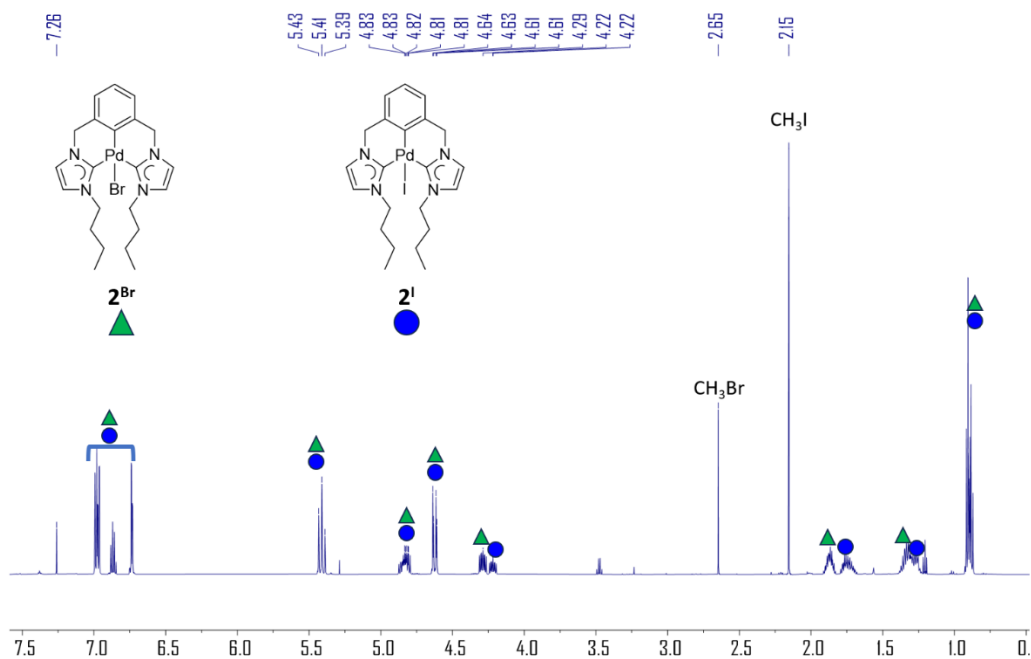

Figure S5 .  $^1\text{H}$  NMR spectra for the reaction of  $2^{\text{Br}}$  with iodomethane

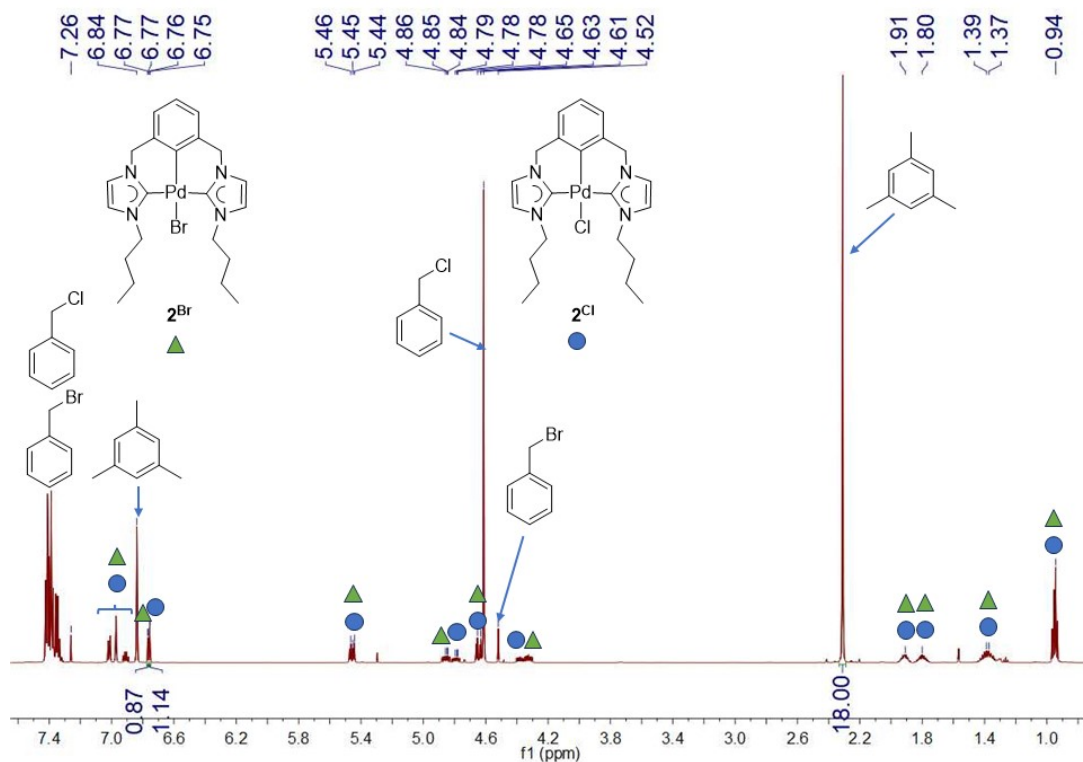

Figure S6 .  $^1\text{H}$  NMR spectra for the reaction of  $2^{\text{Br}}$  with benzyl chloride
